# 1 **Insights on Genetic and Environmental Factors in Parkinson's** 2 **Disease from a regional Swedish Case-Control Cohort**

3

4

5 Kajsa Brolin<sup>1\*</sup>, Sara Bandres-Ciga<sup>2</sup>, Cornelis Blauwendraat<sup>2</sup>, Håkan Widner<sup>3,4</sup>, Per Odin<sup>3,4</sup>,  
6 Oskar Hansson<sup>5,6</sup>, Andreas Puschmann<sup>3,4</sup>, Maria Swanberg<sup>1</sup>

7

8 <sup>1</sup>Lund University, Translational Neurogenetics Unit, Department of Experimental Medical  
9 Science, Lund, Sweden, <sup>2</sup>Laboratory of Neurogenetics, National Institute on Aging, National  
10 Institutes of Health, Bethesda, MD, USA, <sup>3</sup>Lund University, Department of Clinical Sciences  
11 Lund, Neurology, Sweden, <sup>4</sup>Department of Neurology, Skåne University Hospital, Sweden,  
12 <sup>5</sup>Clinical Memory Research Unit, Department of Clinical Sciences Malmö, Lund University,  
13 Sweden, <sup>6</sup>Memory Clinic, Skåne University Hospital, Malmö, Sweden

14

15 \*Corresponding author: Kajsa Brolin, [kajsa.brolin@med.lu.se](mailto:kajsa.brolin@med.lu.se), Translational Neurogenetics,  
16 BMC A10, 221 84, Lund, Sweden

17

## 18 **Abstract**

19 **BACKGROUND:** Risk factors for Parkinson's disease (PD) can be more or less relevant to a  
20 population due to population-specific genetic architecture, local lifestyle habits, and  
21 environmental exposures. Therefore, it is essential to study PD at a local, regional, and  
22 continental scale in order to increase the knowledge on disease etiology.

**NOTE: This preprint reports new research that has not been certified by peer review and should not be used to guide clinical practice.**

23 OBJECTIVE: We aimed to investigate the contribution of genetic and environmental factors  
24 to PD in a new Swedish case-control cohort.

25 METHODS: PD patients (n=929) and matched population-based controls (n=935) from the  
26 southernmost county in Sweden were included in the cohort. Information on environmental  
27 exposures was obtained using questionnaires at inclusion. Genetic analyses included a genome-  
28 wide association study (GWAS), haplotype assessment, and a risk profile analysis using  
29 cumulative genetic risk scores.

30 RESULTS: The cohort is a representative PD case-control cohort (64% men, mean age at  
31 diagnosis=67 years, median Hoehn and Yahr score=2.0), in which previously reported  
32 associations between PD and environmental factors, such as tobacco, could be confirmed. We  
33 describe the first GWAS of PD solely composed of PD patients from Sweden, and confirm  
34 associations to well-established risk alleles in *SNCA*. In addition, we nominate an unconfirmed  
35 and potentially population-specific genome-wide significant association in the *PLPP4* locus  
36 (rs12771445).

37 CONCLUSIONS: This work provides an in-depth description of a new PD case-control cohort  
38 from southern Sweden, giving insights into environmental and genetic risk factors of PD in the  
39 Swedish population.

40

41

42 MESH keywords:

43 Parkinson Disease, Sweden, Case-Control Studies, Risk Factors, Genome-Wide Association

44 Study, Haplotypes

45

46

47

## 48 Introduction

49

50 Parkinson's disease (PD) has been reported to be the fastest growing neurological disorder  
51 worldwide in terms of prevalence, disability, and deaths [1, 2]. Currently available treatments  
52 only address symptoms, and the burden of PD will increase substantially if no disease-  
53 modifying therapeutic is developed.

54

55 PD can be categorized into monogenic and idiopathic (multifactorial) based on the contribution  
56 of genetics to disease risk. In monogenic PD, rare DNA variants with large effect sizes but  
57 varying penetrance cause the disease [3]. Although such variants in *SNCA*, *LRRK2*, *VPS35*,  
58 *PRKN*, *PINK1*, *GBA*, and *DJ-1* [4-9] contribute to a small proportion of cases, these genes have  
59 provided valuable insight into the molecular mechanisms underlying PD etiology and  
60 pathogenesis, as well as an overlapping etiology between monogenic and idiopathic PD.  
61 Missense mutations and copy number variants (CNVs) of *SNCA*, encoding  $\alpha$ -synuclein, have  
62 been identified to cause monogenic PD, whereas common *SNCA* variants have been associated  
63 with an increased risk of idiopathic PD [5]. In idiopathic PD, accounting for more than 95% of  
64 all PD cases, variants with relatively small effect sizes in combination with environmental  
65 exposures influence an individual's disease risk [10, 11]. The latest large-scale genome-wide  
66 association study (GWAS) meta-analysis identified 90 risk loci associated with PD in  
67 individuals of European ancestry [12]. These variants were estimated to explain 16-36% of the  
68 heritable PD risk, indicating that many genetic risk factors for PD remain to be discovered [12].  
69 Additionally, two new risk loci have been reported to be associated with PD risk in the Asian  
70 population [13].

71

72 Larger sample sizes in GWAS could pave the way for the discovery of additional risk variants  
73 and increase the proportion of explained heritability [14, 15]. However, it has also been  
74 suggested that the “missing heritability” could be explained by the presence of gene-gene and  
75 gene-environment interactions [14]. Commonly reported environmental risk factors for PD  
76 include smoking and exposure to pesticides, two exposures that can vary a lot between  
77 population. Further understanding environmental risk factors for PD in different populations  
78 are hence of great importance to further elucidate the pathogenesis of the disease [10, 16, 17].  
79

80 There is a strong population bias towards individuals of European ancestry in genetic research  
81 of human diseases [18, 19], but initiatives are taken to study PD genetic risk in other  
82 populations [20, 21]. In addition to the need of a widened scope of PD genetic research on a  
83 global level, narrowed studies are also of interest, since heterogeneity across cohorts from  
84 different countries or regions may mask genetic associations specific to sub-population [22].  
85

86 The Swedish population has not yet been represented in PD GWAS meta-analyses or  
87 population-specific GWAS aside from a PD GWAS performed on a mixed Scandinavian  
88 population from Norway and Sweden [23]. The Swedish population has been reported to be  
89 genetically similar to the nearby population of Norway [24, 25]. However, it has also been  
90 reported that Swedish genomes contain a substantial amount of genetic variation and genetic  
91 variants that are not represented in other European populations [26], and that there is a large  
92 genetic difference even within the Swedish population, particularly between the south and  
93 north of Sweden [24, 26]. This highlights the importance of analyzing different European  
94 populations, and emphasize the importance of regional matching of cases and controls in  
95 GWAS [24, 27].  
96

97 Here, we provide a comprehensive description of a novel, well-defined, and matched PD case-  
98 control cohort from southern Sweden in which we describe, to our knowledge, the first GWAS  
99 of PD composed solely of individuals from Sweden. This study provides insights into  
100 environmental and genetic risk factors of PD in the Swedish population and will contribute to  
101 the understanding of population-specific environmental and genetic risk in PD.

102

## 103 Materials and Methods

104

### 105 Ethical consent

106 Ethical permission for the MultiPark's biobank sample collection (MPBC) was approved by  
107 the regional ethics review board of Lund (2013/509). All participants gave informed written  
108 consent at study enrollment.

109

### 110 Patient and population-based control inclusion

111 Individuals primarily diagnosed with PD (*International Classification of Disease, tenth*  
112 *revision (ICD-10-SE)* code G20.9) in the southernmost province of Sweden, Scania, were  
113 assessed for eligibility (Figure S1). Inclusion criteria were a PD diagnosis and the ability to  
114 visit one of the clinics for sampling. In total, 2,119 PD patients were invited to participate  
115 between November 2014 and July 2017, whereof 1,011 were included (inclusion rate 48.3%).  
116 For each patient, population-based controls matched by date of birth, sex, and residential area  
117 were randomly selected from the Swedish Population Register and invited between March  
118 2015 and April 2018. A total of 1,001 individuals consented and completed data collection  
119 (inclusion rate 18.5%). Exclusion criteria were a PD diagnosis and the inability to visit a center  
120 for sampling. Out of the completed controls, 953 were unique matchings, resulting in a matched  
121 control for 953 PD patients (94.3%). All analyses were performed in a set of 929 patients and

122 935 controls passing all quality control (QC) steps unless stated otherwise. A flowchart  
123 detailing the study participant inclusion process can be found in Figure S2.

124

### 125 Sample and data collection, storage, and management

126 Blood samples were handled by the Clinical Chemistry Unit at the University Hospital in  
127 Scania (SUS) and stored at -80°C within a central biobanking facility (Biobank Syd: BD47).  
128 Whole blood was collected in EDTA-tubes (Becton Dickinson (BD) Vacutainer®, New Jersey,  
129 US) for DNA extraction. Additional samples were collected in PAXgene blood RNA tubes  
130 (QIAGEN®, Hilden, Germany), EDTA-tubes (BD Vacutainer®), sodium-heparin tubes (BD  
131 Vacutainer®, New Jersey, US) and a serum-separating tube (BD Vacutainer® SST™, New  
132 Jersey, US) to enable future studies of RNA and biomarkers in PD. When difficulties emerged  
133 during blood sample collection, EDTA-tubes for DNA extraction were prioritized. Serum and  
134 plasma samples are stored at -80°C in a 96-well format of 200 µl aliquots.

135

136 All participants filled in questionnaires covering basic demographic data, lifestyle habits,  
137 family history of PD, comorbid diseases, environmental exposures, medications, health status,  
138 and perceived motor- and non-motor symptoms. Data from questionnaires was manually  
139 entered into the web-based application REDCap [28]. Additional data for the PD rating tools  
140 Hoehn and Yahr (H&Y), Clinical Impression of Severity Index - Parkinson's Disease (CISI-  
141 PD), and Parkinson's Disease Questionnaire - 8 (PDQ-8), as well as information on age at  
142 diagnosis (AAD) was retrieved from the Swedish Parkinson's registry  
143 (<https://www.neuroreg.se/parkinsons-sjukdom/>).

144

145

146

147 Statistical analyses of epidemiological data

148 Epidemiologic data was analyzed using R version 4.0.0 [29]. Demographic characteristics were  
149 summarized as frequency and percentage for categorical variables. For continuous variables,  
150 mean and standard deviation (SD) were used for variables displaying normal distribution  
151 whereas median and interquartile range was reported for non-normally distributed variables.  
152 The range for continuous variables was used to demonstrate the heterogeneity in the cohort.  
153 Body mass index (BMI) was calculated as weight (kg)/height (m)<sup>2</sup>. For quality-of-life  
154 assessment, EuroQol five-dimension-3-level (EQ-5D-3L) was used, covering mobility, self-  
155 care, usual activities, pain/discomfort, and anxiety/depression. Time trade-off (TTO) and the  
156 visual analogue scale (VAS) index were calculated using scale value sets for Sweden [30]. In  
157 TTO valuation, individuals were asked to indicate how many years in full health that would be  
158 of equal value to 10 years in their current health state (divided by 10). Full health hence  
159 corresponds to 10 years/10=1. In VAS valuation, respondents rated their overall health between  
160 0 (worst imaginable health) and 100 (best imaginable health) [31]. Additionally, the occurrence  
161 of PD symptoms at study inclusion were compared between the patients and controls using  
162 Pearson's chi square test with a Bonferroni corrected threshold for statistical significance of  
163  $p=0.001$ .

164

165 To test for associations between potential risk factors and PD status, both unadjusted and  
166 multivariate logistic regression analyses were used. Risk factors were selected based on meta-  
167 analysis literature reviews [16, 17]. Due to the cross-sectional case-control study design, we  
168 selected variables from the questionnaire related to past exposures, excluding variables related  
169 to exposures at time or near time of inclusion. Directed acyclic graphs (DAGs) were made for  
170 all exposures of interest using the R package ‘dagitty’ to help identify confounding variables  
171 to adjust for in the multivariate analyses (Figure S3) [32]. Confounding pathways with the least

172 amount of missing data were prioritized and complete-case analyses were run. Odds ratios  
173 (OR), and 95% confidence intervals (CI) were estimated and plotted in a forest plot.

174

175 We further evaluated variables for BMI and comorbidities at inclusion, along with alcohol and  
176 red wine consumption and physical exercise the year prior to inclusion, and ibuprofen use the  
177 past two weeks prior to inclusion, using logistic regression analyses, adjusting for age and sex.  
178 We acknowledge the risk of confounding factors but the interest was solely to perform  
179 observational analyses. Complete-case analyses were run and ORs and 95% CI were estimated  
180 and plotted in a forest plot. A total of 35 comorbidities were not evaluated for association due  
181 to either too few study participants reporting a certain diagnosis or a lack of difference between  
182 the occurrence of the diagnosis between the patient and control group.

183

#### 184 DNA extraction and Genotyping

185 DNA extraction was done from whole blood at BD47 and at LGC Biosearch Technologies  
186 (UK, GEN-9300-120). LGC Biosearch Technologies (Germany) also performed genotyping  
187 and subsequent “Basic BioIT” with technical QC and genotype clustering. The no-call GenCall  
188 threshold was set to the standard score cutoff for Infinium data of 0.15. Matched case-control  
189 samples were genotyped using the Infinium Global Screening Array-24 v.2.0 with the Multi-  
190 Disease drop in panel v.2.0 (GSAMD-24v2.0) containing 712,189 variants annotated to the  
191 Genome Reference Consortium Human Build 37 (GRCh37).

192

#### 193 Genotype quality control and Imputation

194 QC analysis was performed in PLINK 1.9 [33, 34]. Samples were excluded if the call rate was  
195 <95%, if excess heterozygosity was detected (estimated by a F statistic >0.15 or <-0.15), or if  
196 the genetic sex (determined from X-chromosome heterogeneity) differed from the reported sex.



197 Principal component analysis (PCA) was used to identify and exclude ancestry outliers. For  
198 this, the genotype data was merged with the HapMap phase 3 data set [35], and samples were  
199 determined as having European ancestry if they clustered 6 SD (+/-) around the combined  
200 population mean of the populations: Utah residents with Northern and Western European  
201 ancestry (CEU) and Toscani in Italia (TSI) (Figure S4). Samples from closely related  
202 individuals, defined as sharing more than 12.5% of alleles, were also excluded. Following  
203 sample exclusion, 929 patients and 935 controls remained. Variant level QC was subsequently  
204 done, excluding SNPs with a missingness rate >5%, Hardy-Weinberg equilibrium p-value <1E-  
205 4, or minor allele frequency (MAF) <1%. SNPs with differences in genotyping rate for patients  
206 and controls, and genotypes missing by haplotype, were also excluded for p-value <1E-4. SNPs  
207 passing QC were 505,005 with a total genotyping rate of 99.9%. Genomic imputation was  
208 performed on the Michigan Imputation Server [36] using the Minimac4 imputation software,  
209 Eagle v2.4 for phasing [37], and the Haplotype Reference Consortium (HRC) r1.1 2016  
210 European population as the reference population ([http://www.haplotype-reference-](http://www.haplotype-reference-consortium.org/)  
211 [consortium.org/](http://www.haplotype-reference-consortium.org/)) [38]. Post-imputation QC was performed, and variants with MAF<5% and/or  
212 poor imputation quality, set as  $R_{sq} < 0.3$ , were excluded. The number of imputed variants after  
213 filtering was 5,445,841.

214

#### 215 Power calculation for GWAS analyses

216 GWAS power calculation was performed using the online Genetic Association Study (GAS)  
217 Power Calculator ([http://csg.sph.umich.edu/abecasis/gas\\_power\\_calculator/](http://csg.sph.umich.edu/abecasis/gas_power_calculator/)). In order to reach  
218 80% power at a GWAS-significance level ( $\alpha=5E-08$ ) with a disease prevalence in the  
219 general Swedish population of 0.2%, an allele frequency of >20% and an OR>1.7 would be  
220 needed.

221

222 Genome wide association study (GWAS) vs PD risk and age at diagnosis (AAD)

223 A GWAS for PD risk was performed in a logistic regression model adjusted for sex, age (at  
224 study inclusion), and the first 5 principal components (PCs). The number of PCs used in the  
225 analyses was determined by a scree plot (Figure S5). A linear regression model was used to  
226 investigate the impact of genetic variation on the AAD, adjusted for sex and PC1-5. Data on  
227 AAD was available for 792 of the 929 PD patients (85.3%). Summary statistics was generated  
228 using RVTESTS (version 2.1.0) [39]. Quantile-quantile (QQ)-plots and Manhattan plots were  
229 generated in R, version 4.0.0 [29]. Subsequently, regions of interest were visualized using  
230 summary statistics data in the LocalZoom tool (<https://my.locuszoom.org>) with a flanking size  
231 of 100 kb from the gene of interest.

232

233 Haplotype analysis of *PLPP4*

234 Genotyped variants in the *PLPP4* region with a window of  $\pm 100$  kb (*PLPP4* coordinates  
235 on GRCh37; chr10:122216466-122349376, UCSC) was extracted and annotated using  
236 ANNOVAR [40]. Haplotype blocks in the region were estimated in PLINK v1.9 using the  
237 default parameters wherein pairwise LD was calculated for variants within 500 kb [33, 34].  
238 PLINK v1.9 estimates haplotype blocks following the default procedure in Haploview [41, 42].  
239 Association between haplotype blocks in *PLPP4* and PD status was analyzed with haplo.stats  
240 in R. The regression analyses were adjusted for age, sex, and PC1-5, and additionally for  
241 tobacco use. The adjustment for tobacco use was done because of a report of *PLPP4* being  
242 associated with smoking cessation [43], and multiple reports of smoking being associated with  
243 PD. To assimilate the effect of other nicotine products, such as snus (moist tobacco, commonly  
244 consumed in Sweden), the variable “Tobacco” was used. Only haplotypes with a carrier  
245 frequency of  $>1\%$  were included in the analysis. A Bonferroni corrected threshold for statistical

246 significance of  $p=0.05/16=0.003$ . was set. The results were visualized using LocusZoom  
247 (<https://my.locuszoom.org>) and Haploview v4.1 [44].

248

#### 249 Analysis of the joint effect of variants in *PLPP4* on PD risk

250 The contribution of rare variants on PD risk was examined by the joint effect of multiple  
251 variants in the *PLPP4* region. We separately analyzed genotyped and imputed variants with an  
252 imputation quality score of  $R_{sq} > 0.8$  for imputed variants. The sequence kernel association test  
253 (SKAT) was used since only 2.6% of the variants in *PLPP4* are coding variants and the SKAT  
254 is powerful when a large fraction of variants in a region are noncoding. The test aggregates  
255 associations between variants and phenotype and allows for variant interactions [45]. The  
256 analyses were performed in RVTESTS (version 2.1.0) [39] using default parameters and  
257 adjusting for age, sex and PC1-5. The test was performed both for all available variants as well  
258 as in only coding variants with two different maximum MAF thresholds of  $<1\%$  and  $<5\%$ . To  
259 adjust for multiple comparisons, Bonferroni corrected p-value thresholds was applied for all  
260 analyses.

261

#### 262 Risk profile analysis

263 A risk profile analysis for PD and AAD was performed using the imputed data passing QC. A  
264 cumulative genetic risk score (GRS) was calculated in PLINK v1.9 using publicly available  
265 effect estimates (beta coefficients) of 90 SNPs associated with PD in the largest published  
266 meta-analysis of PD GWAS to date [12]. For each SNPs, the allele dosage was multiplied by  
267 the beta coefficient, giving a greater weight to alleles with higher risk estimates. Risk allele  
268 dosage was then summed across all variants to generate a GRS for each study participant.  
269 Subsequently, the GRSs were standardized to Z-scores using the control group as the reference  
270 group for PD status and the patient group for the AAD analysis. Following standardization, a

271 Z score of 1 can be interpreted to be equivalent to one SD increase in the GRS from the  
272 reference group GRS mean. The study participants were divided into quartiles based on their  
273 GRS, and logistic regression analysis was performed to investigate associations and estimate  
274 the OR between PD status and quartile group. Covariates were selected from a previously  
275 published PD classification [46] and included PD family history (yes/no), age at inclusion, sex,  
276 and additionally PC1-5. For the risk profile analysis for AAD, a linear regression model was  
277 used, adjusted for sex, PD family history, and PC1-5. Plots were generated in R, version 4.0.0  
278 [29].

279

280 Code for all analyses will be available at <https://github.com/KajBro/MPBC>, GWAS summary  
281 statistics will be available [online](#).

282

## 283 Results

284

### 285 Characteristics of the MPBC cohort

286 Demographics and characteristics of the MPBC cohort are summarized in Table 1. An expected  
287 male predominance was observed with a sex ratio of 2:1. Case-control matching was successful  
288 for year of birth and sex, with average birth year 1944 and 36% women in both groups. A one-  
289 year difference for the average age at inclusion was observed between patients (71 years) and  
290 controls (72 years) due to control matching occurring after patient inclusion. Swedish ancestry  
291 (defined as self-reporting that both parents were born in Sweden) was similar in patients and  
292 controls (87.9% vs 86.1%). Similar distributions for highest completed education and marital  
293 status were also seen. According to self-reported information on health status using the EQ-  
294 5D-3L instrument [30], patients had an index of 0.8 on the TTO scale compared to 0.9 for the  
295 controls. The patients also rated their own overall health lower than the controls on the VAS

296 index scale (index  $68.9 \pm 16.8$  vs  $82.0 \pm 9.7$ , Table 1). As a reference, the general Swedish  
297 population has an estimated mean TTO index of 0.9 and a VAS index of 79.5 [30]. As expected,  
298 all PD symptoms were more common in the patient group than the control group (Table S3).  
299 The most common self-reported motor-symptoms were muscle stiffness (72.7%) followed by  
300 slowness of movements (72.4%). The most commonly reported non-motor symptom for both  
301 patients and controls was nocturia (71.6% vs 58.4%).

302

303 We further evaluated the health status and AAD among male and female PD patients (Table  
304 2). Median AAD was identical for both sexes (67.0 years), although with a wide range (men  
305 29.0-84.0 years, women 35.0-89.0 years). The median time since diagnosis at inclusion was  
306 4.0 years for both sexes and varied from diagnosis the same year to 36.0 years for men and  
307 33.0 years for women. Health status at the time of inclusion was evaluated using the H&Y  
308 scale, CISI-PD, and PDQ-8. Both sexes had a median of 2.0 on the H&Y, corresponding to  
309 bilateral involvement without impairment of balance. Similar total score values were reported  
310 by men and women on the CISI-PD scale (median 5.0, range 0-24). Women had a slightly  
311 higher median PDQ-8 total score compared to men (7.0 vs 6.0 out of 32).

312

### 313 Epidemiological characteristics of PD in Sweden

314 We further set out to evaluate previously confirmed risk factors for PD in a regional, Swedish  
315 context (Figure 1, Table S1). A positive family history (at least one relative diagnosed with  
316 PD) was overrepresented among PD patients compared to controls (20% vs 11%).  
317 Consequently, having a relative diagnosed with PD doubled the risk of having PD (OR=2.00,  
318 95% CI 1.51-2.67). An association between pesticide exposure and PD was confirmed at an  
319 OR of 2.26 (95% CI 1.39-3.72). A significant association was also seen between PD and a  
320 history of head trauma (OR=1.30, 95% CI 1.08-1.58). However, no association between loss

321 of consciousness and PD was observed among study participants who reported a history of  
322 head trauma. A slightly higher OR was seen for a higher BMI at the age of 20 years (1.05, 95%  
323 CI 1.01-1.09), indicating that a one unit increase in BMI increased the risk of having PD by  
324 5%. However, no difference was observed for the highest reported BMI. We observed an  
325 inverse association between having ever smoked and PD, but the association was not  
326 statistically significant after adjustment for confounders (ever- vs never-smoking OR=0.82,  
327 95% CI 0.67-1.01). A statistically significant inverse association between snus and PD was  
328 observed also after adjusting for confounders (OR=0.53, 95% CI 0.38-0.73). An inverse  
329 association was also observed for the combined effect of tobacco products on PD (adjusted  
330 OR=0.72, 95% CI 0.59-0.88). Moreover, a trend of lower OR for PD with increasing amount  
331 of coffee drinking at all investigated age groups was observed, where drinking >5 cups of  
332 coffee per day was inversely associated with PD (OR 0.36-0.52, 95% CI 0.18-0.86).

333

334 Additionally, variables related to exposure/use within the past year were examined to describe  
335 potential differences between the age- and sex-matched groups at inclusion (Figure 2, Table  
336 S2; Table S3). The patients consumed less alcohol and engaged in less physical activity both  
337 in regard to level of physical activity (regular activity level vs nothing OR=0.26, 95% CI 0.18-  
338 0.38) and hours per week ( $\geq 5$  hours/week vs nothing, OR=0.21, 95% CI 0.13-0.33). No  
339 significant association between PD and BMI at inclusion was observed (OR=0.99, 95% CI  
340 0.96-1.00). For comorbidities, statistically significant inverse associations between PD and a  
341 diagnosis of hyperlipidemia (OR=0.51, 95% CI 0.40-0.64), hypertension (OR=0.57, 95% CI  
342 0.47-0.69), and osteoarthritis (OR=0.66, 95% CI 0.53-0.82) were seen. A significant  
343 association with PD was observed for a diagnosis of depression (OR=1.89, 95% CI 1.39-2.59),  
344 back pain (OR=1.56, 95% CI 1.15-2.13), and bowel problems, where bowel problems (defined  
345 as having constipation or diarrhea that required treatment on a regular basis) almost quadrupled

346 the likelihood of having PD (OR=3.93, 95% CI 2.66-5.97). We observed an OR of 0.53 (95%  
347 CI 0.41-0.68) for the use of ibuprofen <2 times/week compared to never. However, the  
348 association was lost for ibuprofen use  $\geq 2$  times/week. No associations were observed for the  
349 use of other nonsteroidal anti-inflammatory drugs (NSAIDs), such as diclofenac or naproxen  
350 (data not shown).

351

### 352 GWAS of PD risk nominated a novel genome-wide significant variant in the *PLPP4* locus

353 The variant rs356182 in *SNCA* was reported in the latest GWAS meta-analysis as one of the  
354 90 risk loci associated with PD in a cohort of European ancestry [12]. In our GWA analysis for  
355 PD risk, this and another three variants in the *SNCA* locus were observed at low p-values  
356 (rs356182, beta=-0.38, SE=0.07, p=5.64E-08; rs356203, beta=-0.36, SE=0.07, p=1.27E-07;  
357 rs356220, beta=0.36, SE=0.07, p=1.39E-07; rs356219, beta=-0.36, SE=0.07, p=2.32E-07), but  
358 none reached genome-wide significance (Table S4). In addition to the *SNCA* variants, we found  
359 associations for 23 of the 90 previously reported PD risk loci in this Swedish cohort at an  
360 uncorrected p-value of 0.05 (Table S5). Results from PCA showing the population structure as  
361 compared to the HapMap3 reference populations, revealed that this Swedish cohort cluster near  
362 the other European population but the centers of the clusters differ slightly, indicating  
363 differences in population structures that could result in population-specific risk alleles (Figure  
364 S6). The GWA analysis also revealed a novel genome-wide significant association signal in  
365 the *PLPP4* locus, rs12771445 (10:122318147, beta=-0.44, SE=0.07, p=1.30E-08), as being  
366 associated with PD in this Swedish cohort (Figure 3, Table S4). This association has, to our  
367 knowledge, not been reported in any other cohort (Table S4) [12]. The significant variant was  
368 an intron variant in the gene Phospholipid Phosphatase 4 (*PLPP4*) and was imputed with  
369 R<sub>sq</sub>=0.99 and MAF=0.31 (Table S4). The MAF is similar to the value observed in the Swedish  
370 reference population, SweGen, of 0.32 [26]. The estimated MAF was 0.27 in the patient group



371 and 0.36 in the control group, indicating a potential protective effect of the minor allele (T)  
372 with an OR of 0.64. To further display the association signals relative to genomic position and  
373 local LD, locus zoom plots for *PLPP4* rs12771445 and *SNCA* rs356182 were produced (Figure  
374 4 and Figure S10). Variants in *SNCA* have been reported to also be associated with PD AAO  
375 [47]. We performed a GWA for the related variable AAD of PD in the cohort. However, we  
376 did not detect any genome-wide statistically significant associations and could not replicate  
377 previous reported variants associated with PD AAO at low p-values, likely due to smaller  
378 sample size (792 vs 28,568) [47], and limited statistical power (Figure S11 and S12).

379  
380 In order to analyze more genetic variants, imputation was done using the beta-version of the  
381 TOPMed Imputation Reference panel [48]. Using the same post-imputation QC, 6,214,098  
382 variants were generated and analyzed in a GWAS for PD risk (Figure S8 and S9). Two variants  
383 passed genome-wide significance, rs12772937 (chr10:122318146, beta=-0.40, SE=0.07,  
384 p=2.48E-08) and our previously identified rs12771445 (10:122318147, beta=-0.40, SE=0.07,  
385 p=2.48E-08). Since the TOPMed panel was still in the beta stage as of our analysis, we  
386 continued using the data imputed with the HRC version r1.1 2016 panel.

387

### 388 Haplotype analysis of *PLPP4*

389 Because of the identification of the novel genome-wide signal (rs12771445) associated with  
390 PD in this cohort, we further looked at haplotypes among the genotyped variants in the nearest  
391 gene, *PLPP4* ( $\pm$  100 kb), to capture the genetic variance in the region. We identified 92  
392 genotyped variants passing QC in the region, where 32 were in *PLPP4*, all intron variants. The  
393 median GenCall scores of these variants was 0.87 (IQR: 0.83–0.91) (Figure S13). A total of 45  
394 different haplotypes in 12 different blocks (H1-H12) in the region was identified (Table 3,  
395 Figure S14). Statistically significant association with PD was observed for a haplotype in one



396 block (H6) ( $p=2.45E-05$ ), both before and after adjustment. The haplotype block spanned over  
397 41.9 kB (chr10:122302038-122343950) and consisted of five genetic variants and six different  
398 haplotypes. The rs978854(G)-rs7910507(G)-rs10886711(G)-rs11199417(G)-rs10886717(A)  
399 haplotype was statistically significantly inversely associated with PD at an OR of 0.69 (95%  
400 CI 0.59-0.82,  $p=2.54E-05$ ) and with a MAF=0.24 for patients and 0.30 for controls.

401

#### 402 Analysis of the joint effect of variants in *PLPP4* on PD risk

403 We further evaluated the joint effect of more rare variants (MAF <5%) in *PLPP4* on PD risk  
404 using both genotyped and imputed data. No coding variants in the gene were identified in the  
405 genotyped data and only one was identified in the imputed data (Table 5). When focusing on  
406 all variants, an association in the genotyped data at MAF<5% was observed ( $p=0.002$ ), passing  
407 Bonferroni correction. A trend of a potential joint effect of variants with a MAF<5% was still  
408 observed in the imputed data ( $p=0.005$ ). However, it did not reach multiple testing corrections  
409 ( $p\text{-value threshold}=0.05/628=7.96E-05$ ). Only one variant with MAF<1% was present in the  
410 genotyped data and no statistically significant association was observed for variants with  
411 MAF<1% in either the genotyped or the imputed data.

412

#### 413 Genetic PD risk profile

414 The PD risk profile analysis showed that the Z-standardized GRS from Nalls et al was  
415 associated with PD status also in this Swedish case-control cohort [12]. For each SD increase  
416 from the reference mean value, the OR increased by 1.8 ( $\beta=0.59$ ,  $SE=0.05$ ,  $p<2.22E-16$ )  
417 (Figure 5). Study participants in the highest GRS quartile were estimated to be 4.7 times more  
418 likely to have PD compared to the participants in the lowest quartile using an adjusted model.  
419 There was also an inverse association between the GRS and AAD, where one SD increase in

420 the Z-standardized GRS was associated with approximately one-year earlier AAD (beta=-0.97,  
421 SE=0.36, p=0.007, adjusted r<sup>2</sup>=0.011).

422

## 423 Discussion

424

425 This study is, to our knowledge, the largest case-control study of PD performed in a Swedish  
426 cohort. The study includes a well-defined recruitment of matched study participants from a  
427 specific region in southern Sweden. Multiple previously reported environmental and genetic  
428 risk factors were confirmed to affect PD risk. Interestingly, a novel genome-wide significant  
429 association with PD risk at the *PLPP4* locus was observed, both in the GWA and the haplotype  
430 analysis but further validation of the nominated variant is needed.

431

432 The MPBC cohort demonstrates similar characteristics compared to other PD cohorts. At  
433 inclusion, the patients had a relatively short disease duration (average 4 years), which was  
434 reflected in the PD rating scales with an average score of 2 on the H&Y scale and low scores  
435 on the CISI-PD and PDQ-8 scales. This can be explained by the study inclusion design where  
436 patients with advanced PD, who could not visit a neurology clinic, were not eligible. For self-  
437 reported PD symptoms, hypokinesia/bradykinesia was most common, occurring in 72% of the  
438 patients. Non-motor symptoms occurring at later stages of the disease, such as delusions and  
439 hallucinations were less frequent (6.0% and 16.8%), also highlighting the lower number of  
440 patients with advanced PD in the cohort [49]. The lack of an association between BMI at  
441 inclusion and PD further highlight this. Weight loss has frequently been observed in PD  
442 patients as a consequence of reduced energy intake in combination with an increased energy  
443 expenditure due e.g. levodopa-induced dyskinesia [50]. It has been estimated that PD patients  
444 lose 3.5 kg every eight years post-diagnosis and that levodopa-induced dyskinesia commonly

445 develops after 3-5 years [50, 51]. Approximately 92% of the patients in the cohort reported  
446 using levodopa therapy.

447

448 Several previously reported environmental PD risk factors could be confirmed in this Swedish  
449 cohort. Among those, an association between pesticide exposure and PD was observed, where  
450 exposure to pesticides more than doubled the risk of having PD. The number of participants  
451 exposed to pesticides was overrepresented among those who had reported farming and well  
452 water consumption. However, no statistically significant association was observed between  
453 farming or well water and PD in the cohort. Several pesticides have been reported to be linked  
454 to PD, including paraquat, glyphosate, and pyrethroids [52]. Paraquat was banned in Sweden  
455 in 1983 while glyphosates and pyrethroids are still used [53]. However, further actions need to  
456 be taken to investigate which chemicals stand behind the observed association.

457

458 Having a relative with a PD diagnosis doubled the risk of having PD in the cohort. Among the  
459 20% of patients that reported a positive family history, 8.9% had a first-degree relative with  
460 PD. Other studies report similar numbers with 15-25% of PD patients having a positive family  
461 history and 10-25% having a first-degree relative with PD [54]. It has been suggested that the  
462 risk of PD increases shortly after a traumatic brain injury (TBI) and that a history of  
463 concussions results in a higher risk of PD [55, 56]. We also observed a statistically significant  
464 association between a history of head trauma and PD, but whether the association is causative  
465 or a consequence of prodromal PD remains to be determined. Among participants reporting  
466 head trauma, no association was observed between PD and loss of consciousness.

467

468 The inverse association between smoking and PD is well-known and has been reported in  
469 numerous studies [17]. This was initially replicated in the cohort, but no longer statistically

470 significant after adjustment for confounders, which could be due to the common co-occurrence  
471 of smoking and the use of snus. Interestingly though, a strong inverse association between the  
472 Swedish moist tobacco snus and PD was observed also after adjustment. The amount of  
473 nicotine reaching the blood when using snus is equivalent of that of cigarette smoking, and the  
474 observation reduces the number of candidate compounds underlying the inverse association  
475 between smoking and PD [57, 58]. It has previously been reported that non-smoking, snus-  
476 using Swedish men had 60% lower risk of PD compared to men who had never used snus [58].  
477 Snus is more frequently used than smoking tobacco among men in Sweden, where 18% use  
478 snus and 7% smoke on a daily basis. Among Swedish women, 5% use snus and 7% smoke on  
479 a daily basis [59]. We investigated the total effect of smoking and snus on PD risk and found  
480 a statistically significant inverse association to PD also for the combined variable “Tobacco”.  
481 Our findings support previous reports and suggest either that components in tobacco leaves  
482 influence biological processes underlying PD, or that there is a reverse causation between  
483 tobacco use and PD. Nicotine has been suggested to have neuroprotective properties but it also  
484 stimulates dopamine release from nigrostriatal dopaminergic terminals. Hence, the lower use  
485 of tobacco products could be a consequence of a reduced nicotine-evoked dopamine release  
486 among prodromal PD patients [60]. Caffeine has also been reported to have neuroprotective  
487 effects in PD animal models, and several epidemiological studies have reported a relationship  
488 between increased coffee consumption and decreased risk of developing PD [10]. We could  
489 also observe a trend of lower OR for PD with higher coffee consumption in all investigated  
490 age groups in this cohort.

491  
492 The comorbidities hypertension, hyperlipidemia, and osteoarthritis were inversely associated  
493 with PD in the cohort. Autonomic dysfunction can occur in PD, resulting in abnormalities in  
494 blood pressure, and orthostatic hypotension is common [61]. In concordance with our results,

495 meta-analysis of PD risk factors has identified an inverse association between hypertension  
496 and PD risk [16]. However, this was only observed in case-control studies, indicating that the  
497 association might be a consequence of the disease. For hyperlipidemia, there are conflicting  
498 reports on the association with PD but a meta-analysis supports an inverse association [62]. It  
499 is possible that the use of lipid-lowering drugs (statins) contributes to the observed conflicting  
500 associations [63]. The study participants were asked whether they had been diagnosed with  
501 hyperlipidemia and, hence, it was likely that they used pharmacological treatments. Statins are  
502 the most commonly prescribed lipid-lowering drugs in Sweden, and we cannot rule out that the  
503 observed inverse association between PD and hyperlipidemia is a consequence of statin use.  
504 Moreover, the PD patients were less likely to have a diagnosis of osteoarthritis (21% patients  
505 vs 29% controls). Contrary to our observation, arthritis (no distinction was made between  
506 rheumatoid arthritis and osteoarthritis) has been reported to be the most prevalent comorbidity  
507 in PD, with almost 47% reported having the condition [64], indicating that our observation  
508 could be a consequence of underdiagnosis of osteoarthritis among the PD patients [65].  
509 Furthermore, associations between PD and the comorbidities depression, back pain, and bowel  
510 problems were observed. Use of ibuprofen has been reported to be inversely associated with  
511 PD in a dose-dependent manner [66]. We observed a reduced PD risk for the use of the NSAID  
512 ibuprofen <2 times/week but not for  $\geq 2$  times/week and a recently published large study do not  
513 support any evidence of a decreased PD incidence among NSAID users [67].

514

515 Here, we describe to our knowledge the first GWAS of PD composed solely of PD patients  
516 from Sweden, specifically the southernmost region of Sweden. Although the relatively small  
517 sample size is a limitation in this study, issues with population stratification are expected to be  
518 lower due to region-specific study recruitment and, potentially, more homogenous ancestry.  
519 The observed near genome-wide significance associated variants at the *SNCA* locus indicate

520 that this cohort is a well-designed case-control cohort of PD, and one of the variants was  
521 reported among the 90 risk loci in the largest GWAS meta-analysis to date [12]. Another 23 of  
522 the 90 risk loci were replicated at a nominal uncorrected p-value <0.05. Noticeable, this study  
523 had insufficient statistical power to detect variants with low MAF or small effect size, and the  
524 majority of 90 risk loci had an OR of 0.8-1.2 [12]. Insufficient statistical power is likely also  
525 the reason for the lack of an identification of any loci associated with AAD. Two genome-wide  
526 significant association signals have previously been reported to be linked to PD AAO, one at  
527 the *SNCA* locus and one at *TMEM175* [47].

528

529 Interestingly, the GWA analysis identified a novel variant, rs12771445, associated with PD at  
530 a genome-wide significance level. This variant has not been reported in the PD literature and,  
531 hence, may be specific for the Swedish population. Although, it could be that this common  
532 variant is a tagging a population-specific rare variant as the Swedish population appear to  
533 contain a substantial number of genetic variants that are not represented in other European  
534 populations [26]. However, the significant variant was imputed and we remain cautious in  
535 drawing any conclusions. As expected, we further identified one haplotype in *PLPP4*  
536 significantly associated with PD. The haplotype was more common among controls, indicating  
537 a decreased risk of PD among carriers. Furthermore, we investigated the joint effect of rare  
538 variants (MAF<5%) in *PLPP4* on PD. Due to the low coverage of coding variants, we adapted  
539 the non-burden SKAT and observed an association with PD risk for the genotyped variants but  
540 not for the imputed variants. Replication studies in larger Swedish cohorts are needed in order  
541 to validate our findings of a potential association between *PLPP4* and PD in the Swedish  
542 population.

543

544 The gene *PLPP4*, encodes for a phospholipid phosphatase that catalyzes the dephosphorylation  
545 of bioactive lipid mediators such as phosphatidic acid (PA) [68]. Another regulator of PA  
546 content, the diacylglycerol kinase, *DGKQ*, has previously been reported as a potential PD risk  
547 factor [69, 70]. The role of lipids in PD is receiving greater attention and the question whether  
548 if PD is a lipidopathy rather than a proteinopathy has been lifted [71]. Several reasons stand  
549 behind this hypothesis, including the proposal that  $\alpha$ -synuclein is a lipid-binding protein that  
550 physiologically interacts with phospholipids and fatty acids (FAs) [71].

551

552 Although only 23 out of 90 previously reported risk variants were replicated in this Swedish  
553 cohort, the cumulative GRS based on the 90 variants showed an almost five-fold higher risk  
554 for PD in the highest quartile compared to the lowest quartile. Combining the GRS with  
555 information on age, sex, family history of PD, and the University of Pennsylvania Smell  
556 Identification Test (UPSIT) score (olfactory function) has been reported to further increase the  
557 sensitivity and specificity of the PD status model [46]. Having access to all factors but the  
558 UPSIT score, we added information on age, sex, family history of PD and PC1-5 to our model.  
559 GRS alone gave an area under the roc curve (AUC) of 0.67 while the adjusted model gave an  
560 AUC of 0.68. The non-observed difference for the two models could be due to the large  
561 proportion of the variance explained by the UPSIT score in the reported prediction model  
562 (63.1%) compared to the substantially lower values for GRS (13.6%), family history (11.4%),  
563 gender (6.0%) and age (5.9%) [46]. The lack of association to PD in the Swedish cohort for  
564 67/90 risk variants could also have an impact on the fit of the model applied in our cohort.  
565 Although the model is functional enough to compare risk for disease status at a population  
566 level, additional information would be needed for disease prediction. Interestingly, we  
567 observed an association between the GRS and AAD despite a small sample size, with one SD

568 increase in the Z-standardized GRS being associated with approximately one-year earlier  
569 AAD. This result is in concordance with previous results in other, larger, PD cohorts [22, 47].

570

571 Among the 90 risk variants, the *LRRK2* G2019S (rs34637584) had the largest effect estimate  
572 (2.43). This variant was genotyped in our dataset but excluded during the pre-imputation QC  
573 due to low MAF (0.2%). Previous studies of PD cohorts in Sweden have shown that the  
574 prevalence of *LRRK2* G2019S carriers is low in Sweden, 0.54% of screened 2206 PD patients  
575 were carriers [72]. It has been estimated that the G2019S mutation worldwide accounts for 4%  
576 of familial and 1% of idiopathic PD cases [73]. In our study, the fraction of carriers among the  
577 patients was 0.75%, further confirming a low prevalence of *LRRK2* G2019S carriers among  
578 Swedish PD patients.

579

580 In conclusion, this work represents a comprehensive description of a new PD case-control  
581 cohort from southern Sweden in which we nominate a novel GWA variant in the *PLPP4* locus.  
582 However, subsequent studies are needed in order to validate whether *PLPP4* is associated with  
583 PD within the Swedish population. This study contributes to the understanding of  
584 environmental and genetic risk factors in PD in the Swedish population, and the combination  
585 of epidemiological, clinical, and genetic data in the cohort makes it suitable for future studies  
586 of PD etiology.

587

## 588 Acknowledgments

589

590 This research was supported by MultiPark – a Strategic Research Area at Lund University and  
591 by grants from the Swedish Research Council (VR), Åke Wiberg's foundation,  
592 Parkinsonfonden, Åhlén foundation, Lindhés advokatbyrå, and Sigurd & Elsa Golje's



593 memorial foundation (KB/MS). This work was also supported in part by the Intramural  
594 Research Program of the National Institute on Aging (NIA) (SBC/CB), part of the National  
595 Institutes of Health, Department of Health and Human Services. We thank the individuals who  
596 have contributed and donated blood samples to MPBC. We would also like to thank the  
597 research nurses and statistician Helene Jacobsson at MultiPark for conducting data collections,  
598 and previous students of the Translational Neurogenetics Unit who have helped with  
599 questionnaire registration to REDCap. We would like to thank Megg Garcia and Alexander  
600 Svanbergsson for technical help and feedback, and the International Parkinson's Disease  
601 Genomic Consortium (IPDGC) and its trainee network for additional help during the project,  
602 in particularly Lynne Krohn and Manuela Tan. We would also like to acknowledge the Global  
603 Parkinson's Genetics Program (GP2) learning platform for training courses and code in  
604 Parkinson's disease genetics. We would also like to acknowledge Ashfaq Ali at the National  
605 Bioinformatics Infrastructure Sweden at SciLifeLab for bioinformatics advice. The Region  
606 Skåne Biobank Facility (BD47) has performed the biobank services in the project.

607

608 AP receives research support from the Swedish government (ALF), Region Skåne, Skåne  
609 University Hospital, Bundy Academy, Hans Gabriel and Alice Trolle Wachtmeister Stiftelse  
610 för Medicinsk Forskning, The Swedish Parkinson Association, The Swedish Parkinson  
611 Academy, SCA network, all in Sweden, and receives reimbursement from Elsevier Ltd. PO  
612 has received research support from The Swedish National Government and County Councils,  
613 Skåne University Hospital Foundations and Donations, Region Skåne, Parkinsonfonden,  
614 Swedish Parkinson Academy and Åhlens Foundation.

615

616

## 617 Conflict of Interest

618

619 KB, MS, SBC, CB, AP, PO and HW have no conflicts of interest to report. OH has acquired  
620 research support (for the institution) from AVID Radiopharmaceuticals, Biogen, Eli Lilly,  
621 Eisai, GE Healthcare, Pfizer, and Roche. In the past 2 years, he has received  
622 consultancy/speaker fees from AC Immune, Alzpath, Biogen, Cerveau, and Roche.

623

## 624 References

625

- 626 [1] Collaborators GPsD (2018) Global, regional, and national burden of Parkinson's  
627 disease, 1990-2016: a systematic analysis for the Global Burden of Disease Study  
628 2016. *Lancet Neurol* **17**, 939-953.
- 629 [2] Collaborators GBDN (2019) Global, regional, and national burden of neurological  
630 disorders, 1990-2016: a systematic analysis for the Global Burden of Disease Study  
631 2016. *Lancet Neurol*.
- 632 [3] Blauwendraat C, Nalls MA, Singleton AB (2020) The genetic architecture of  
633 Parkinson's disease. *Lancet Neurol* **19**, 170-178.
- 634 [4] Bonifati V, Rizzu P, van Baren MJ, Schaap O, Breedveld GJ, Krieger E, Dekker MC,  
635 Squitieri F, Ibanez P, Jooze M, van Dongen JW, Vanacore N, van Swieten JC, Brice  
636 A, Meco G, van Duijn CM, Oostra BA, Heutink P (2003) Mutations in the DJ-1 gene  
637 associated with autosomal recessive early-onset parkinsonism. *Science* **299**, 256-259.
- 638 [5] Kitada T, Asakawa S, Hattori N, Matsumine H, Yamamura Y, Minoshima S, Yokochi  
639 M, Mizuno Y, Shimizu N (1998) Mutations in the parkin gene cause autosomal  
640 recessive juvenile parkinsonism. *Nature* **392**, 605-608.

- 641 [6] Polymeropoulos MH, Lavedan C, Leroy E, Ide SE, Dehejia A, Dutra A, Pike B, Root  
642 H, Rubenstein J, Boyer R, Stenroos ES, Chandrasekharappa S, Athanassiadou A,  
643 Papapetropoulos T, Johnson WG, Lazzarini AM, Duvoisin RC, Di Iorio G, Golbe LI,  
644 Nussbaum RL (1997) Mutation in the alpha-synuclein gene identified in families with  
645 Parkinson's disease. *Science* **276**, 2045-2047.
- 646 [7] Valente EM, Abou-Sleiman PM, Caputo V, Muqit MM, Harvey K, Gispert S, Ali Z,  
647 Del Turco D, Bentivoglio AR, Healy DG, Albanese A, Nussbaum R, González-  
648 Maldonado R, Deller T, Salvi S, Cortelli P, Gilks WP, Latchman DS, Harvey RJ,  
649 Dallapiccola B, Auburger G, Wood NW (2004) Hereditary early-onset Parkinson's  
650 disease caused by mutations in PINK1. *Science* **304**, 1158-1160.
- 651 [8] Zimprich A, Benet-Pagès A, Struhal W, Graf E, Eck SH, Offman MN, Haubenberger  
652 D, Spielberger S, Schulte EC, Lichtner P, Rossle SC, Klopp N, Wolf E, Seppi K,  
653 Pirker W, Presslauer S, Mollenhauer B, Katzenschlager R, Foki T, Hotzy C,  
654 Reinthaler E, Harutyunyan A, Kralovics R, Peters A, Zimprich F, Brücke T, Poewe  
655 W, Auff E, Trenkwalder C, Rost B, Ransmayr G, Winkelmann J, Meitinger T, Strom  
656 TM (2011) A mutation in VPS35, encoding a subunit of the retromer complex, causes  
657 late-onset Parkinson disease. *Am J Hum Genet* **89**, 168-175.
- 658 [9] Zimprich A, Biskup S, Leitner P, Lichtner P, Farrer M, Lincoln S, Kachergus J,  
659 Hulihan M, Uitti RJ, Calne DB, Stoessl AJ, Pfeiffer RF, Patenge N, Carbajal IC,  
660 Vieregge P, Asmus F, Müller-Myhsok B, Dickson DW, Meitinger T, Strom TM,  
661 Wszolek ZK, Gasser T (2004) Mutations in LRRK2 cause autosomal-dominant  
662 parkinsonism with pleomorphic pathology. *Neuron* **44**, 601-607.
- 663 [10] de Lau LM, Breteler MM (2006) Epidemiology of Parkinson's disease. *Lancet Neurol*  
664 **5**, 525-535.

- 665 [11] Vollstedt EJ, Kasten M, Klein C (2019) Using global team science to identify genetic  
666 parkinson's disease worldwide. *Ann Neurol* **86**, 153-157.
- 667 [12] Nalls MA, Blauwendraat C, Vallerga CL, Heilbron K, Bandres-Ciga S, Chang D, Tan  
668 M, Kia DA, Noyce AJ, Xue A, Bras J, Young E, von Coelln R, Simón-Sánchez J,  
669 Schulte C, Sharma M, Krohn L, Pihlstrøm L, Siitonen A, Iwaki H, Leonard H, Faghri  
670 F, Gibbs JR, Hernandez DG, Scholz SW, Botia JA, Martinez M, Corvol J-C, Lesage  
671 S, Jankovic J, Shulman LM, Sutherland M, Tienari P, Majamaa K, Toft M,  
672 Andreassen OA, Bangale T, Brice A, Yang J, Gan-Or Z, Gasser T, Heutink P,  
673 Shulman JM, Wood NW, Hinds DA, Hardy JA, Morris HR, Gratten J, Visscher PM,  
674 Graham RR, Singleton AB, andMe Research T, System Genomics of Parkinson's  
675 Disease C, International Parkinson's Disease Genomics C (2019) Identification of  
676 novel risk loci, causal insights, and heritable risk for Parkinson's disease: a meta-  
677 analysis of genome-wide association studies. *The Lancet. Neurology* **18**, 1091-1102.
- 678 [13] Foo JN, Chew EGY, Chung SJ, Peng R, Blauwendraat C, Nalls MA, Mok KY, Satake  
679 W, Toda T, Chao Y, Tan LCS, Tandiono M, Lian MM, Ng EY, Prakash KM, Au WL,  
680 Meah WY, Mok SQ, Annuar AA, Chan AYY, Chen L, Chen Y, Jeon BS, Jiang L,  
681 Lim JL, Lin JJ, Liu C, Mao C, Mok V, Pei Z, Shang HF, Shi CH, Song K, Tan AH,  
682 Wu YR, Xu YM, Xu R, Yan Y, Yang J, Zhang B, Koh WP, Lim SY, Khor CC, Liu J,  
683 Tan EK (2020) Identification of Risk Loci for Parkinson Disease in Asians and  
684 Comparison of Risk Between Asians and Europeans: A Genome-Wide Association  
685 Study. *JAMA Neurol* **77**, 746-754.
- 686 [14] Génin E (2020) Missing heritability of complex diseases: case solved? *Human*  
687 *Genetics* **139**, 103-113.
- 688 [15] Young AI (2019) Solving the missing heritability problem. *PLoS Genet* **15**,  
689 e1008222.

- 690 [16] Noyce AJ, Bestwick JP, Silveira-Moriyama L, Hawkes CH, Giovannoni G, Lees AJ,  
691 Schrag A (2012) Meta-analysis of early nonmotor features and risk factors for  
692 Parkinson disease. *Ann Neurol* **72**, 893-901.
- 693 [17] Bellou V, Belbasis L, Tzoulaki I, Evangelou E, Ioannidis JP (2016) Environmental  
694 risk factors and Parkinson's disease: An umbrella review of meta-analyses.  
695 *Parkinsonism Relat Disord* **23**, 1-9.
- 696 [18] Sirugo G, Williams SM, Tishkoff SA (2019) The Missing Diversity in Human  
697 Genetic Studies. *Cell* **177**, 26-31.
- 698 [19] Popejoy AB, Fullerton SM (2016) Genomics is failing on diversity. *Nature* **538**, 161-  
699 164.
- 700 [20] International Parkinson Disease Genomics C (2020) Ten Years of the International  
701 Parkinson Disease Genomics Consortium: Progress and Next Steps. *Journal of*  
702 *Parkinson's disease* **10**, 19-30.
- 703 [21] Loesch DP, Horimoto A, Heilbron K, Sarihan EI, Inca-Martinez M, Mason E,  
704 Cornejo-Olivas M, Torres L, Mazzetti P, Cosentino C, Sarapura-Castro E, Rivera-  
705 Valdivia A, Medina AC, Dieguez E, Raggio V, Lescano A, Tumas V, Borges V,  
706 Ferraz HB, Rieder CR, Schumacher-Schuh A, Santos-Lobato BL, Velez-Pardo C,  
707 Jimenez-Del-Rio M, Lopera F, Moreno S, Chana-Cuevas P, Fernandez W, Arboleda  
708 G, Arboleda H, Arboleda-Bustos CE, Yearout D, Zabetian CP, Cannon P, Thornton  
709 TA, O'Connor TD, Mata IF (2021) Characterizing the Genetic Architecture of  
710 Parkinson's Disease in Latinos. *Ann Neurol*.
- 711 [22] Bandres-Ciga S, Ahmed S, Sabir MS, Blauwendraat C, Adames-Gómez AD, Bernal-  
712 Bernal I, Bonilla-Toribio M, Buiza-Rueda D, Carrillo F, Carrión-Claro M, Gómez-  
713 Garre P, Jesús S, Labrador-Espinosa MA, Macias D, Méndez-Del-Barrio C, Periñán-  
714 Tocino T, Tejera-Parrado C, Vargas-González L, Diez-Fairen M, Alvarez I, Tartari

- 715 JP, Buongiorno M, Aguilar M, Gorostidi A, Bergareche JA, Mondragon E, Vinagre-  
716 Aragon A, Croitoru I, Ruiz-Martínez J, Dols-Icardo O, Kulisevsky J, Marín-Lahoz J,  
717 Pagonabarraga J, Pascual-Sedano B, Ezquerra M, Cámara A, Compta Y, Fernández  
718 M, Fernández-Santiago R, Muñoz E, Tolosa E, Valldeoriola F, Gonzalez-Aramburu I,  
719 Sanchez Rodriguez A, Sierra M, Menéndez-González M, Blazquez M, Garcia C,  
720 Suarez-San Martin E, García-Ruiz P, Martínez-Castrillo JC, Vela-Desojo L, Ruz C,  
721 Barrero FJ, Escamilla-Sevilla F, Mínguez-Castellanos A, Cerdan D, Tabernero C,  
722 Gomez Heredia MJ, Perez Errazquin F, Romero-Acebal M, Feliz C, Lopez-Sendon  
723 JL, Mata M, Martínez Torres I, Kim JJ, Dalgard CL, American Genome C, Brooks J,  
724 Saez-Atienzar S, Gibbs JR, Jorda R, Botia JA, Bonet-Ponce L, Morrison KE, Clarke  
725 C, Tan M, Morris H, Edsall C, Hernandez D, Simon-Sanchez J, Nalls MA, Scholz  
726 SW, Jimenez-Escrig A, Duarte J, Vives F, Duran R, Hoenicka J, Alvarez V, Infante J,  
727 Marti MJ, Clarimón J, López de Munain A, Pastor P, Mir P, Singleton A,  
728 International Parkinson Disease Genomics C (2019) The Genetic Architecture of  
729 Parkinson Disease in Spain: Characterizing Population-Specific Risk, Differential  
730 Haplotype Structures, and Providing Etiologic Insight. *Movement disorders : official  
731 journal of the Movement Disorder Society* **34**, 1851-1863.
- 732 [23] Pihlstrøm L, Axelsson G, Bjørnarå KA, Dizdar N, Fardell C, Forsgren L, Holmberg  
733 B, Larsen JP, Linder J, Nissbrandt H, Tysnes OB, Ohman E, Dietrichs E, Toft M  
734 (2013) Supportive evidence for 11 loci from genome-wide association studies in  
735 Parkinson's disease. *Neurobiol Aging* **34**, 1708.e1707-1713.
- 736 [24] Humphreys K, Grankvist A, Leu M, Hall P, Liu J, Ripatti S, Rehnström K, Groop L,  
737 Klareskog L, Ding B, Grönberg H, Xu J, Pedersen NL, Lichtenstein P, Mattingsdal  
738 M, Andreassen OA, O'Dushlaine C, Purcell SM, Sklar P, Sullivan PF, Hultman CM,

- 739 Palmgren J, Magnusson PKE (2011) The genetic structure of the Swedish population.  
740 *PloS one* **6**, e22547-e22547.
- 741 [25] Nelis M, Esko T, Mägi R, Zimprich F, Zimprich A, Toncheva D, Karachanak S,  
742 Piskácková T, Balascák I, Peltonen L, Jakkula E, Rehnström K, Lathrop M, Heath S,  
743 Galan P, Schreiber S, Meitinger T, Pfeufer A, Wichmann HE, Melegh B, Polgár N,  
744 Toniolo D, Gasparini P, D'Adamo P, Klovins J, Nikitina-Zake L, Kucinskas V,  
745 Kasnauskienė J, Lubinski J, Debniak T, Limborska S, Khrunin A, Estivill X, Rabionet  
746 R, Marsal S, Julià A, Antonarakis SE, Deutsch S, Borel C, Attar H, Gagnebin M,  
747 Macek M, Krawczak M, Remm M, Metspalu A (2009) Genetic structure of  
748 Europeans: a view from the North-East. *PloS one* **4**, e5472-e5472.
- 749 [26] Ameer A, Dahlberg J, Olason P, Vezzi F, Karlsson R, Martin M, Viklund J, Kähäri  
750 AK, Lundin P, Che H, Thutkawkorapin J, Einfeldt J, Lampa S, Dahlberg M, Hagberg  
751 J, Jareborg N, Liljedahl U, Jonasson I, Johansson Å, Feuk L, Lundeberg J, Syvänen  
752 AC, Lundin S, Nilsson D, Nystedt B, Magnusson PK, Gyllensten U (2017) SweGen:  
753 a whole-genome data resource of genetic variability in a cross-section of the Swedish  
754 population. *Eur J Hum Genet* **25**, 1253-1260.
- 755 [27] Salmela E, Lappalainen T, Liu J, Sistonen P, Andersen PM, Schreiber S, Savontaus  
756 M-L, Czene K, Lahermo P, Hall P, Kere J (2011) Swedish population substructure  
757 revealed by genome-wide single nucleotide polymorphism data. *PloS one* **6**, e16747-  
758 e16747.
- 759 [28] Harris PA, Taylor R, Thielke R, Payne J, Gonzalez N, Conde JG (2009) Research  
760 electronic data capture (REDCap)—A metadata-driven methodology and workflow  
761 process for providing translational research informatics support. *Journal of*  
762 *Biomedical Informatics* **42**, 377-381.
- 763 [29] R Core Team (2020) R Foundation for Statistical Computing, Vienna, Austria.

- 764 [30] Burström K, Sun S, Gerdtham UG, Henriksson M, Johannesson M, Levin L,  
765 Zethraeus N (2014) Swedish experience-based value sets for EQ-5D health states.  
766 *Qual Life Res* **23**, 431-442.
- 767 [31] Burström K, Teni FS, Gerdtham UG, Leidl R, Helgesson G, Rolfson O, Henriksson  
768 M (2020) Experience-Based Swedish TTO and VAS Value Sets for EQ-5D-5L Health  
769 States. *Pharmacoeconomics* **38**, 839-856.
- 770 [32] Textor J, van der Zander B, Gilthorpe MS, Liškiewicz M, Ellison GTH (2016) Robust  
771 causal inference using directed acyclic graphs: the R package ‘dagitty’. *International*  
772 *Journal of Epidemiology* **45**, 1887-1894.
- 773 [33] Purcell S, Neale B, Todd-Brown K, Thomas L, Ferreira MA, Bender D, Maller J,  
774 Sklar P, de Bakker PI, Daly MJ, Sham PC (2007) PLINK: a tool set for whole-  
775 genome association and population-based linkage analyses. *Am J Hum Genet* **81**, 559-  
776 575.
- 777 [34] Chang CC, Chow CC, Tellier LC, Vattikuti S, Purcell SM, Lee JJ (2015) Second-  
778 generation PLINK: rising to the challenge of larger and richer datasets. *Gigascience*  
779 **4**, 7.
- 780 [35] Gibbs RA, Belmont JW, Hardenbol P, Willis TD, Yu F, Yang H, Ch'ang L-Y, Huang  
781 W, Liu B, Shen Y, Tam PK-H, Tsui L-C, Waye MMY, Wong JT-F, Zeng C, Zhang  
782 Q, Chee MS, Galver LM, Kruglyak S, Murray SS, Oliphant AR, Montpetit A, Hudson  
783 TJ, Chagnon F, Ferretti V, Leboeuf M, Phillips MS, Verner A, Kwok P-Y, Duan S,  
784 Lind DL, Miller RD, Rice JP, Saccone NL, Taillon-Miller P, Xiao M, Nakamura Y,  
785 Sekine A, Sorimachi K, Tanaka T, Tanaka Y, Tsunoda T, Yoshino E, Bentley DR,  
786 Deloukas P, Hunt S, Powell D, Altshuler D, Gabriel SB, Zhang H, Zeng C, Matsuda I,  
787 Fukushima Y, Macer DR, Suda E, Rotimi CN, Adebamowo CA, Aniagwu T,  
788 Marshall PA, Matthew O, Nkwodimmah C, Royal CDM, Leppert MF, Dixon M,



789 Stein LD, Cunningham F, Kanani A, Thorisson GA, Chakravarti A, Chen PE, Cutler  
790 DJ, Kashuk CS, Donnelly P, Marchini J, McVean GAT, Myers SR, Cardon LR,  
791 Abecasis GR, Morris A, Weir BS, Mullikin JC, Sherry ST, Feolo M, Altshuler D,  
792 Daly MJ, Schaffner SF, Qiu R, Kent A, Dunston GM, Kato K, Niikawa N, Knoppers  
793 BM, Foster MW, Clayton EW, Wang VO, Watkin J, Gibbs RA, Belmont JW,  
794 Sodergren E, Weinstock GM, Wilson RK, Fulton LL, Rogers J, Birren BW, Han H,  
795 Wang H, Godbout M, Wallenburg JC, L'Archevêque P, Bellemare G, Todani K,  
796 Fujita T, Tanaka S, Holden AL, Lai EH, Collins FS, Brooks LD, McEwen JE, Guyer  
797 MS, Jordan E, Peterson JL, Spiegel J, Sung LM, Zacharia LF, Kennedy K, Dunn MG,  
798 Seabrook R, Shillito M, Skene B, Stewart JG, Valle DL, Clayton EW, Jorde LB,  
799 Belmont JW, Chakravarti A, Cho MK, Duster T, Foster MW, Jasperse M, Knoppers  
800 BM, Kwok P-Y, Licinio J, Long JC, Marshall PA, Ossorio PN, Wang VO, Rotimi  
801 CN, Royal CDM, Spallone P, Terry SF, Lander ES, Lai EH, Nickerson DA, Abecasis  
802 GR, Altshuler D, Bentley DR, Boehnke M, Cardon LR, Daly MJ, Deloukas P,  
803 Douglas JA, Gabriel SB, Hudson RR, Hudson TJ, Kruglyak L, Kwok P-Y, Nakamura  
804 Y, Nussbaum RL, Royal CDM, Schaffner SF, Sherry ST, Stein LD, Tanaka T, †The  
805 International HapMap C, Genotyping centres: Baylor College of M, ParAllele B,  
806 Chinese HapMap C, Illumina, McGill U, Génome Québec Innovation C, University  
807 of California at San F, Washington U, University of T, Riken, Wellcome Trust Sanger  
808 I, Whitehead Institute MITCfGR, Community engagement/public c, sample-  
809 collection groups: Beijing Normal U, Beijing Genomics I, Health Sciences University  
810 of Hokkaido EEI, Shinshu U, Howard U, University of I, University of U, Analysis  
811 Groups: Cold Spring Harbor L, Johns Hopkins University School of M, University of  
812 O, University of Oxford WTCfHG, Health USNIo, Ethical L, Social Issues: Chinese  
813 Academy of Social S, Genetic Interest G, Howard U, Kyoto U, Nagasaki U,

814 University of M, University of O, Vanderbilt U, Wellcome T, Medicine SNPDBCo,  
815 Washington U, Scientific Management: Chinese Academy of S, Chinese Ministry of  
816 S, Technology, Genome C, Génome Q, Japanese Ministry of Education CSS,  
817 Technology, The SNPc, Initial Planning Groups P, Ethical L, Social Issues G,  
818 Methods G (2003) The International HapMap Project. *Nature* **426**, 789-796.

819 [36] Das S, Forer L, Schonherr S, Sidore C, Locke AE, Kwong A, Vrieze SI, Chew EY,  
820 Levy S, McGue M, Schlessinger D, Stambolian D, Loh PR, Iacono WG, Swaroop A,  
821 Scott LJ, Cucca F, Kronenberg F, Boehnke M, Abecasis GR, Fuchsberger C (2016)  
822 Next-generation genotype imputation service and methods. *Nat Genet* **48**, 1284-1287.

823 [37] Loh PR, Danecek P, Palamara PF, Fuchsberger C, Y AR, H KF, Schoenherr S, Forer  
824 L, McCarthy S, Abecasis GR, Durbin R, A LP (2016) Reference-based phasing using  
825 the Haplotype Reference Consortium panel. *Nat Genet* **48**, 1443-1448.

826 [38] McCarthy S, Das S, Kretzschmar W, Delaneau O, Wood AR, Teumer A, Kang HM,  
827 Fuchsberger C, Danecek P, Sharp K, Luo Y, Sidore C, Kwong A, Timpson N,  
828 Koskinen S, Vrieze S, Scott LJ, Zhang H, Mahajan A, Veldink J, Peters U, Pato C,  
829 van Duijn CM, Gillies CE, Gandin I, Mezzavilla M, Gilly A, Cocca M, Traglia M,  
830 Angius A, Barrett JC, Boomsma D, Branham K, Breen G, Brummett CM, Busonero  
831 F, Campbell H, Chan A, Chen S, Chew E, Collins FS, Corbin LJ, Smith GD,  
832 Dedoussis G, Dorr M, Farmaki AE, Ferrucci L, Forer L, Fraser RM, Gabriel S, Levy  
833 S, Groop L, Harrison T, Hattersley A, Holmen OL, Hveem K, Kretzler M, Lee JC,  
834 McGue M, Meitinger T, Melzer D, Min JL, Mohlke KL, Vincent JB, Nauck M,  
835 Nickerson D, Palotie A, Pato M, Pirastu N, McInnis M, Richards JB, Sala C, Salomaa  
836 V, Schlessinger D, Schoenherr S, Slagboom PE, Small K, Spector T, Stambolian D,  
837 Tuke M, Tuomilehto J, Van den Berg LH, Van Rheenen W, Volker U, Wijmenga C,  
838 Toniolo D, Zeggini E, Gasparini P, Sampson MG, Wilson JF, Frayling T, de Bakker

- 839 PI, Swertz MA, McCarroll S, Kooperberg C, Dekker A, Altshuler D, Willer C, Iacono  
840 W, Ripatti S, Soranzo N, Walter K, Swaroop A, Cucca F, Anderson CA, Myers RM,  
841 Boehnke M, McCarthy MI, Durbin R (2016) A reference panel of 64,976 haplotypes  
842 for genotype imputation. *Nat Genet* **48**, 1279-1283.
- 843 [39] Zhan X, Hu Y, Li B, Abecasis GR, Liu DJ (2016) RVTESTS: an efficient and  
844 comprehensive tool for rare variant association analysis using sequence data.  
845 *Bioinformatics* **32**, 1423-1426.
- 846 [40] Wang K, Li M, Hakonarson H (2010) ANNOVAR: functional annotation of genetic  
847 variants from high-throughput sequencing data. *Nucleic Acids Res* **38**, e164.
- 848 [41] Gabriel SB, Schaffner SF, Nguyen H, Moore JM, Roy J, Blumenstiel B, Higgins J,  
849 DeFelice M, Lochner A, Faggart M, Liu-Cordero SN, Rotimi C, Adeyemo A, Cooper  
850 R, Ward R, Lander ES, Daly MJ, Altshuler D (2002) The structure of haplotype  
851 blocks in the human genome. *Science* **296**, 2225-2229.
- 852 [42] Barrett JC, Fry B, Maller J, Daly MJ (2005) Haploview: analysis and visualization of  
853 LD and haplotype maps. *Bioinformatics* **21**, 263-265.
- 854 [43] Uhl GR, Drgon T, Johnson C, Walther D, David SP, Aveyard P, Murphy M,  
855 Johnstone EC, Munafò MR (2010) Genome-wide association for smoking cessation  
856 success: participants in the Patch in Practice trial of nicotine replacement.  
857 *Pharmacogenomics* **11**, 357-367.
- 858 [44] Barrett JC, Fry B, Maller J, Daly MJ (2005) Haploview: analysis and visualization of  
859 LD and haplotype maps. *Bioinformatics* **21**, 263-265.
- 860 [45] Lee S, Emond MJ, Bamshad MJ, Barnes KC, Rieder MJ, Nickerson DA, Christiani  
861 DC, Wurfel MM, Lin X (2012) Optimal unified approach for rare-variant association  
862 testing with application to small-sample case-control whole-exome sequencing  
863 studies. *Am J Hum Genet* **91**, 224-237.

- 864 [46] Nalls MA, McLean CY, Rick J, Eberly S, Hutten SJ, Gwinn K, Sutherland M,  
865 Martinez M, Heutink P, Williams NM, Hardy J, Gasser T, Brice A, Price TR, Nicolas  
866 A, Keller MF, Molony C, Gibbs JR, Chen-Plotkin A, Suh E, Letson C, Fiandaca MS,  
867 Mapstone M, Federoff HJ, Noyce AJ, Morris H, Van Deerlin VM, Weintraub D,  
868 Zabetian C, Hernandez DG, Lesage S, Mullins M, Conley ED, Northover CAM,  
869 Frasier M, Marek K, Day-Williams AG, Stone DJ, Ioannidis JPA, Singleton AB,  
870 Parkinson's Disease Biomarkers P, Parkinson's Progression Marker Initiative i (2015)  
871 Diagnosis of Parkinson's disease on the basis of clinical and genetic classification: a  
872 population-based modelling study. *The Lancet. Neurology* **14**, 1002-1009.
- 873 [47] Blauwendraat C, Heilbron K, Vallerga CL, Bandres-Ciga S, von Coelln R, Pihlstrom  
874 L, Simon-Sanchez J, Schulte C, Sharma M, Krohn L, Siitonen A, Iwaki H, Leonard  
875 H, Noyce AJ, Tan M, Gibbs JR, Hernandez DG, Scholz SW, Jankovic J, Shulman  
876 LM, Lesage S, Corvol JC, Brice A, van Hilten JJ, Marinus J, Eerola-Rautio J, Tienari  
877 P, Majamaa K, Toft M, Grosset DG, Gasser T, Heutink P, Shulman JM, Wood N,  
878 Hardy J, Morris HR, Hinds DA, Gratten J, Visscher PM, Gan-Or Z, Nalls MA,  
879 Singleton AB (2019) Parkinson's disease age at onset genome-wide association study:  
880 Defining heritability, genetic loci, and alpha-synuclein mechanisms. *Mov Disord*.
- 881 [48] Taliun D, Harris DN, Kessler MD, Carlson J, Szpiech ZA, Torres R, Taliun SAG,  
882 Corvelo A, Gogarten SM, Kang HM, Pitsillides AN, LeFaive J, Lee S-b, Tian X,  
883 Browning BL, Das S, Emde A-K, Clarke WE, Loesch DP, Shetty AC, Blackwell TW,  
884 Smith AV, Wong Q, Liu X, Conomos MP, Bobo DM, Aguet F, Albert C, Alonso A,  
885 Ardlie KG, Arking DE, Aslibekyan S, Auer PL, Barnard J, Barr RG, Barwick L,  
886 Becker LC, Beer RL, Benjamin EJ, Bielak LF, Blangero J, Boehnke M, Bowden DW,  
887 Brody JA, Burchard EG, Cade BE, Casella JF, Chalazan B, Chasman DI, Chen Y-DI,  
888 Cho MH, Choi SH, Chung MK, Clish CB, Correa A, Curran JE, Custer B, Darbar D,

889 Daya M, de Andrade M, DeMeo DL, Dutcher SK, Ellinor PT, Emery LS, Eng C,  
890 Fatkin D, Fingerlin T, Forer L, Fornage M, Franceschini N, Fuchsberger C, Fullerton  
891 SM, Germer S, Gladwin MT, Gottlieb DJ, Guo X, Hall ME, He J, Heard-Costa NL,  
892 Heckbert SR, Irvin MR, Johnsen JM, Johnson AD, Kaplan R, Kardina SLR, Kelly T,  
893 Kelly S, Kenny EE, Kiel DP, Klemmer R, Konkole BA, Kooperberg C, Kottgen A,  
894 Lange LA, Lasky-Su J, Levy D, Lin X, Lin K-H, Liu C, Loos RJJ, Garman L,  
895 Gerszten R, Lubitz SA, Lunetta KL, Mak ACY, Manichaikul A, Manning AK,  
896 Mathias RA, McManus DD, McGarvey ST, Meigs JB, Meyers DA, Mikulla JL,  
897 Minear MA, Mitchell BD, Mohanty S, Montasser ME, Montgomery C, Morrison AC,  
898 Murabito JM, Natale A, Natarajan P, Nelson SC, North KE, O'Connell JR, Palmer  
899 ND, Pankratz N, Peloso GM, Peyser PA, Pleiness J, Post WS, Psaty BM, Rao DC,  
900 Redline S, Reiner AP, Roden D, Rotter JJ, Ruczinski I, Sarnowski C, Schoenherr S,  
901 Schwartz DA, Seo J-S, Seshadri S, Sheehan VA, Sheu WH, Shoemaker MB, Smith  
902 NL, Smith JA, Sotoodehnia N, Stilp AM, Tang W, Taylor KD, Telen M, Thornton  
903 TA, Tracy RP, Van Den Berg DJ, Vasan RS, Viaud-Martinez KA, Vrieze S, Weeks  
904 DE, Weir BS, Weiss ST, Weng L-C, Willer CJ, Zhang Y, Zhao X, Arnett DK,  
905 Ashley-Koch AE, Barnes KC, Boerwinkle E, Gabriel S, Gibbs R, Rice KM, Rich SS,  
906 Silverman EK, Qasba P, Gan W, Abe N, Almasy L, Ament S, Anderson P, Anugu P,  
907 Applebaum-Bowden D, Assimes T, Avramopoulos D, Barron-Casella E, Beaty T,  
908 Beck G, Becker D, Beitelshes A, Benos T, Bezerra M, Bis J, Bowler R, Broeckel U,  
909 Broome J, Bunting K, Bustamante C, Buth E, Cardwell J, Carey V, Carty C, Casaburi  
910 R, Castaldi P, Chaffin M, Chang C, Chang Y-C, Chavan S, Chen B-J, Chen W-M,  
911 Chuang L-M, Chung R-H, Comhair S, Cornell E, Crandall C, Crapo J, Curtis J,  
912 Damcott C, David S, Davis C, Fuentes Ldl, DeBaun M, Deka R, Devine S, Duan Q,  
913 Duggirala R, Durda JP, Eaton C, Ekunwe L, El Boueiz A, Erzurum S, Farber C,

- 914 Flickinger M, Fornage M, Frazar C, Fu M, Fulton L, Gao S, Gao Y, Gass M, Gelb B,  
915 Geng XP, Geraci M, Ghosh A, Gignoux C, Glahn D, Gong D-W, Goring H, Graw S,  
916 Grine D, Gu CC, Guan Y, Gupta N, Haessler J, Hawley NL, Heavner B, Herrington  
917 D, Hersh C, Hidalgo B, Hixson J, Hobbs B, Hokanson J, Hong E, Hoth K, Hsiung  
918 CA, Hung Y-J, Huston H, Hwu CM, Jackson R, Jain D, Jhun MA, Johnson C,  
919 Johnston R, Jones K, Kathiresan S, Khan A, Kim W, Kinney G, Kramer H, Lange C,  
920 Lange E, Lange L, Laurie C, LeBoff M, Lee J, Lee SS, Lee W-J, Levine D, Lewis J,  
921 Li X, Li Y, Lin H, Lin H, Lin KH, Liu S, Liu Y, Liu Y, Luo J, Mahaney M,  
922 Consortium NT-OfPM (2021) Sequencing of 53,831 diverse genomes from the  
923 NHLBI TOPMed Program. *Nature* **590**, 290-299.
- 924 [49] Schapira AHV, Chaudhuri KR, Jenner P (2017) Non-motor features of Parkinson  
925 disease. *Nature Reviews Neuroscience* **18**, 435-450.
- 926 [50] Kashihara K (2006) Weight loss in Parkinson's disease. *J Neurol* **253 Suppl 7**, Vii38-  
927 41.
- 928 [51] Pandey S, Srivanitchapoom P (2017) Levodopa-induced Dyskinesia: Clinical  
929 Features, Pathophysiology, and Medical Management. *Annals of Indian Academy of*  
930 *Neurology* **20**, 190-198.
- 931 [52] Freire C, Koifman S (2012) Pesticide exposure and Parkinson's disease:  
932 Epidemiological evidence of association. *NeuroToxicology* **33**, 947-971.
- 933 [53] KEMI, Statistics on pesticides, Swedish Chemicals Agency,  
934 <https://www.kemi.se/en/statistics-on-chemicals-in-sweden/statistics-on-pesticides>,  
935 November 27 2020, Accessed May 5 2021.
- 936 [54] Sellbach AN, Boyle RS, Silburn PA, Mellick GD (2006) Parkinson's disease and  
937 family history. *Parkinsonism & Related Disorders* **12**, 399-409.

- 938 [55] Marras C, Hincapié CA, Kristman VL, Cancelliere C, Soklaridis S, Li A, Borg J, af  
939 Geijerstam JL, Cassidy JD (2014) Systematic review of the risk of Parkinson's disease  
940 after mild traumatic brain injury: results of the International Collaboration on Mild  
941 Traumatic Brain Injury Prognosis. *Arch Phys Med Rehabil* **95**, S238-244.
- 942 [56] Jafari S, Etminan M, Aminzadeh F, Samii A (2013) Head injury and risk of Parkinson  
943 disease: a systematic review and meta-analysis. *Mov Disord* **28**, 1222-1229.
- 944 [57] Holm H, Jarvis MJ, Russell MA, Feyerabend C (1992) Nicotine intake and  
945 dependence in Swedish snuff takers. *Psychopharmacology (Berl)* **108**, 507-511.
- 946 [58] Yang F, Pedersen NL, Ye W, Liu Z, Norberg M, Forsgren L, Trolle Lagerros Y,  
947 Bellocco R, Alfredsson L, Knutsson A, Jansson JH, Wennberg P, Galanti MR, Lager  
948 ACJ, Araghi M, Lundberg M, Magnusson C, Wirdefeldt K (2017) Moist smokeless  
949 tobacco (Snus) use and risk of Parkinson's disease. *Int J Epidemiol* **46**, 872-880.
- 950 [59] Tobacco, Public Health Agency of Sweden,  
951 [https://www.folkhalsomyndigheten.se/the-public-health-agency-of-sweden/living-  
952 conditions-and-lifestyle/alcohol-narcotics-doping-tobacco-and-gambling/tobacco/](https://www.folkhalsomyndigheten.se/the-public-health-agency-of-sweden/living-conditions-and-lifestyle/alcohol-narcotics-doping-tobacco-and-gambling/tobacco/),  
953 June 28 2019, Accessed April 20.
- 954 [60] Quik M (2004) Smoking, nicotine and Parkinson's disease. *Trends in Neurosciences*  
955 **27**, 561-568.
- 956 [61] Hou L, Li Q, Jiang L, Qiu H, Geng C, Hong J-S, Li H, Wang Q (2018) Hypertension  
957 and Diagnosis of Parkinson's Disease: A Meta-Analysis of Cohort Studies. *Frontiers*  
958 *in neurology* **9**, 162-162.
- 959 [62] Jiang Z, Xu X, Gu X, Ou R, Luo X, Shang H, Song W (2020) Effects of Higher  
960 Serum Lipid Levels on the Risk of Parkinson's Disease: A Systematic Review and  
961 Meta-Analysis. *Front Neurol* **11**, 597.



- 962 [63] Yan J, Qiao L, Tian J, Liu A, Wu J, Huang J, Shen M, Lai X (2019) Effect of statins  
963 on Parkinson's disease: A systematic review and meta-analysis. *Medicine* **98**.
- 964 [64] Jones JD, Malaty I, Price CC, Okun MS, Bowers D (2012) Health comorbidities and  
965 cognition in 1948 patients with idiopathic Parkinson's disease. *Parkinsonism Relat*  
966 *Disord* **18**, 1073-1078.
- 967 [65] Rugbjerg K, Friis S, Jørgensen TL, Ritz B, Korbo L, Olsen JH (2010) Risk for  
968 Parkinson's disease among patients with osteoarthritis: a Danish cohort study. *Mov*  
969 *Disord* **25**, 2355-2360.
- 970 [66] Gao X, Chen H, Schwarzschild MA, Ascherio A (2011) Use of ibuprofen and risk of  
971 Parkinson disease. *Neurology* **76**, 863-869.
- 972 [67] Brakedal B, Tzoulis C, Tysnes OB, Haugarvoll K (2021) NSAID use is not associated  
973 with Parkinson's disease incidence: A Norwegian Prescription Database study. *PLoS*  
974 *One* **16**, e0256602.
- 975 [68] Zhang X, Zhang L, Lin B, Chai X, Li R, Liao Y, Deng X, Liu Q, Yang W, Cai Y,  
976 Zhou W, Lin Z, Huang W, Zhong M, Lei F, Wu J, Yu S, Li X, Li S, Li Y, Zeng J,  
977 Long W, Ren D, Huang Y (2017) Phospholipid Phosphatase 4 promotes proliferation  
978 and tumorigenesis, and activates Ca(2+)-permeable Cationic Channel in lung  
979 carcinoma cells. *Mol Cancer* **16**, 147.
- 980 [69] Simón-Sánchez J, van Hilten JJ, van de Warrenburg B, Post B, Berendse HW,  
981 Arepalli S, Hernandez DG, de Bie RM, Velseboer D, Scheffer H, Bloem B, van Dijk  
982 KD, Rivadeneira F, Hofman A, Uitterlinden AG, Rizzu P, Bochdanovits Z, Singleton  
983 AB, Heutink P (2011) Genome-wide association study confirms extant PD risk loci  
984 among the Dutch. *Eur J Hum Genet* **19**, 655-661.
- 985 [70] Nalls MA, Pankratz N, Lill CM, Do CB, Hernandez DG, Saad M, DeStefano AL,  
986 Kara E, Bras J, Sharma M, Schulte C, Keller MF, Arepalli S, Letson C, Edsall C,



987 Stefansson H, Liu X, Pliner H, Lee JH, Cheng R, International Parkinson's Disease  
988 Genomics C, Parkinson's Study Group Parkinson's Research: The Organized GI,  
989 andMe, GenePd, NeuroGenetics Research C, Hussman Institute of Human G,  
990 Ashkenazi Jewish Dataset I, Cohorts for H, Aging Research in Genetic E, North  
991 American Brain Expression C, United Kingdom Brain Expression C, Greek  
992 Parkinson's Disease C, Alzheimer Genetic Analysis G, Ikram MA, Ioannidis JPA,  
993 Hadjigeorgiou GM, Bis JC, Martinez M, Perlmutter JS, Goate A, Marder K, Fiske B,  
994 Sutherland M, Xiromerisiou G, Myers RH, Clark LN, Stefansson K, Hardy JA,  
995 Heutink P, Chen H, Wood NW, Houlden H, Payami H, Brice A, Scott WK, Gasser T,  
996 Bertram L, Eriksson N, Foroud T, Singleton AB (2014) Large-scale meta-analysis of  
997 genome-wide association data identifies six new risk loci for Parkinson's disease.  
998 *Nature genetics* **46**, 989-993.

999 [71] Fanning S, Selkoe D, Dettmer U (2020) Parkinson's disease: proteinopathy or  
1000 lipidopathy? *npj Parkinson's Disease* **6**, 3.

1001 [72] Puschmann A, Jiménez-Ferrer I, Lundblad-Andersson E, Mårtensson E, Hansson O,  
1002 Odin P, Widner H, Brolin K, Mzezewa R, Kristensen J, Soller M, Rödström EY, Ross  
1003 OA, Toft M, Breedveld GJ, Bonifati V, Brodin L, Zettergren A, Sydow O, Linder J,  
1004 Wirdefeldt K, Svenningsson P, Nissbrandt H, Belin AC, Forsgren L, Swanberg M  
1005 (2019) Low prevalence of known pathogenic mutations in dominant PD genes: A  
1006 Swedish multicenter study. *Parkinsonism & related disorders* **66**, 158-165.

1007 [73] Tolosa E, Vila M, Klein C, Rascol O (2020) LRRK2 in Parkinson disease: challenges  
1008 of clinical trials. *Nature Reviews Neurology* **16**, 97-107.

1009  
1010

## Tables

**Table 1: Characteristics of participants (individuals with Parkinson’s disease (PD) and individuals without the disease [controls]) in the MPBC cohort.**

|                                            | Patients (N=929) | Controls (N=935) |
|--------------------------------------------|------------------|------------------|
| <b>Sex</b>                                 |                  |                  |
| n                                          | 929              | 935              |
| Men                                        | 599 (64.5%)      | 598 (64.0%)      |
| Women                                      | 330 (35.5%)      | 337 (36.0%)      |
| <b>Birth year</b>                          |                  |                  |
| n                                          | 929              | 935              |
| Mean (SD)                                  | 1944.4 (8.4)     | 1944.4 (8.3)     |
| Range                                      | 1920.0-1979.0    | 1920.0-1980.0    |
| <b>Age at inclusion</b>                    |                  |                  |
| n                                          | 929              | 935              |
| Mean (SD)                                  | 71.0 (8.3)       | 72.3 (8.3)       |
| Range                                      | 37.0-96.0        | 38.0-97.0        |
| <b>Swedish ancestry</b>                    |                  |                  |
| n                                          | 922              | 921              |
| No                                         | 112 (12.1%)      | 128 (13.9%)      |
| Yes                                        | 810 (87.9%)      | 793 (86.1%)      |
| <b>Highest completed education</b>         |                  |                  |
| n                                          | 923              | 929              |
| < Primary and lower secondary education    | 8 (0.9%)         | 4 (0.4%)         |
| Primary and lower secondary education      | 241 (26.1%)      | 232 (25.0%)      |
| Upper secondary education                  | 403 (43.7%)      | 384 (41.3%)      |
| University                                 | 271 (29.4%)      | 309 (33.3%)      |
| <b>BMI at inclusion (kg/m<sup>2</sup>)</b> |                  |                  |
| n                                          | 914              | 921              |
| Mean (SD)                                  | 25.8 (4.4)       | 26.0 (3.9)       |
| Range                                      | 15.2-48.8        | 15.9-42.3        |
| <b>Marital status</b>                      |                  |                  |
| n                                          | 925              | 931              |
| Single                                     | 57 (6.2%)        | 62 (6.7%)        |
| Married/Civil partnership                  | 719 (77.7%)      | 713 (76.6%)      |
| Divorced/Separated                         | 71 (7.7%)        | 60 (6.4%)        |
| Widow/Widower                              | 78 (8.4%)        | 96 (10.3%)       |
| <b>TTO Index</b>                           |                  |                  |
| n                                          | 898              | 903              |
| Mean (SD)                                  | 0.8 (0.1)        | 0.9 (0.1)        |
| Range                                      | 0.4-1.0          | 0.5-1.0          |
| <b>VAS Index</b>                           |                  |                  |
| n                                          | 898              | 903              |
| Mean (SD)                                  | 68.9 (16.8)      | 82.0 (9.7)       |
| Range                                      | 17.2-88.9        | 20.9-88.9        |

Swedish ancestry: Both parents were born in Sweden. BMI: Body Mass Index; TTO: Time Trade Of, EQ-5D-3L;

VAS: Visual Analogue Scale, EQ-5D-3L

**Table 2: Characteristics of individuals with Parkinson’s disease in the MPBC cohort.**

|                                    | <b>Men (N=599)</b> | <b>Women (N=330)</b> |
|------------------------------------|--------------------|----------------------|
| <b>Age at diagnosis</b>            |                    |                      |
| n                                  | 503                | 289                  |
| Median (Q1, Q3)                    | 67.0 (60.0, 72.0)  | 67.0 (59.0, 73.0)    |
| Range                              | 29.0-84.0          | 35.0-89.0            |
| <b>Disease length at inclusion</b> |                    |                      |
| n                                  | 503                | 289                  |
| Median (Q1, Q3)                    | 4.0 (1.5, 8.0)     | 4.0 (2.0, 7.0)       |
| Range                              | 0.0-36.0           | 0.0-33.0             |
| <b>Hoehn &amp; Yahr</b>            |                    |                      |
| n                                  | 514                | 295                  |
| Median (Q1, Q3)                    | 2.0 (1.5, 3.0)     | 2.0 (1.5, 3.0)       |
| Range                              | 0.0-5.0            | 0.0-5.0              |
| <b>CISI-PD</b>                     |                    |                      |
| n                                  | 518                | 301                  |
| Median (Q1, Q3)                    | 5.0 (3.0, 8.0)     | 5.0 (2.0, 7.0)       |
| Range                              | 0.0-21.0           | 0.0-20.0             |
| <b>PDQ-8</b>                       |                    |                      |
| n                                  | 518                | 299                  |
| Median (Q1, Q3)                    | 6.0 (2.0, 10.0)    | 7.0 (3.0, 11.0)      |
| Range                              | 0.0-25.0           | 0.0-21.0             |

Data retrieved from the Swedish Parkinson Registry. CISI-PD: Clinical Impression of Severity Index – Parkinson’s Disease, summary score; PDQ-8: Parkinson’s Disease Questionnaire – 8, summary score.

**Table 3: Identified haplotypes in the *PLPP4* locus**

| Locus     | SNPs (N) | Haplotype    | MAF Pat.     | MAF Ctrls    | KB            | OR <sup>a</sup> | 95%CI <sup>a</sup> | P-value <sup>a</sup> | OR <sup>b</sup> | 95%CI <sup>b</sup> | P-value <sup>b</sup> | OR <sup>c</sup> | 95%CI            | P-value <sup>c</sup> | SNPs                                                                               |
|-----------|----------|--------------|--------------|--------------|---------------|-----------------|--------------------|----------------------|-----------------|--------------------|----------------------|-----------------|------------------|----------------------|------------------------------------------------------------------------------------|
| H1        | 8        | GACGGGG      | 0.901        | 0.911        | 41.334        | 1.00            | Ref.               | 3.00E-01             | 1.00            | Ref.               | 3.20E-01             | 1.00            | Ref.             | 3.00E-01             | rs2420703 rs71484626 rs2420706 rs2420707 rs2901235 rs12571802 rs2901237 rs17100130 |
| H1        | 8        | AGAAAAA      | 0.013        | 0.012        | 41.334        | 1.19            | 0.92-1.5           | 1.73E-01             | 1.19            | 0.92-1.5           | 8.20E-01             | 1.20            | 0.92-1.6         | 1.70E-01             | rs2420703 rs71484626 rs2420706 rs2420707 rs2901235 rs12571802 rs2901237 rs17100130 |
| H1        | 8        | GGCGAGGG     | 0.076        | 0.065        | 41.334        | 1.09            | 0.60-2.0           | 8.10E-01             | 1.08            | 0.59-2.0           | 1.80E-01             | 1.07            | 0.58-1.9         | 8.60E-01             | rs2420703 rs71484626 rs2420706 rs2420707 rs2901235 rs12571802 rs2901237 rs17100130 |
| H2        | 2        | GG           | 0.750        | 0.763        | 10.817        | 1.00            | Ref.               | 3.28E-01             | 1.00            | Ref.               | 3.16E-01             | 1.00            | Ref.             | 4.39E-01             | rs7068076 rs36108282                                                               |
| H2        | 2        | AA           | 0.071        | 0.047        | 10.817        | 1.56            | 1.17-2.06          | 1.48E-03             | 1.54            | 1.16-2.04          | 2.31E-03             | 1.48            | 1.11-1.97        | 5.57E-03             | rs7068076 rs36108282                                                               |
| H2        | 2        | AG           | 0.178        | 0.188        | 10.817        | 0.97            | 0.82-1.14          | 4.15E-01             | 0.97            | 0.82-1.15          | 4.74E-01             | 0.96            | 0.81-1.14        | 4.23E-01             | rs7068076 rs36108282                                                               |
| H3        | 3        | GAG          | 0.448        | 0.450        | 7.153         | 1.00            | Ref.               | 9.07E-01             | 1.00            | Ref.               | 9.93E-01             | 1.00            | Ref.             | 8.53E-01             | rs4595466 rs2244544 rs7772193                                                      |
| H3        | 3        | GGG          | 0.129        | 0.094        | 7.153         | 1.34            | 1.08-1.65          | 1.30E-03             | 1.33            | 1.07-1.65          | 1.36E-03             | 1.31            | 1.06-1.63        | 1.99E-03             | rs4595466 rs2244544 rs7772193                                                      |
| H3        | 3        | GGA          | 0.082        | 0.070        | 7.153         | 1.19            | 0.92-1.53          | 1.56E-01             | 1.17            | 0.91-1.51          | 1.83E-01             | 1.14            | 0.89-1.48        | 2.38E-01             | rs4595466 rs2244544 rs7772193                                                      |
| H3        | 3        | AGG          | 0.341        | 0.386        | 7.153         | 0.88            | 0.76-1.02          | 4.12E-03             | 0.88            | 0.76-1.01          | 3.30E-03             | 0.87            | 0.75-1.01        | 3.10E-03             | rs4595466 rs2244544 rs7772193                                                      |
| H4        | 2        | CA           | 0.492        | 0.512        | 5.468         | 1.00            | Ref.               | 2.35E-01             | 1.00            | Ref.               | 2.71E-01             | 1.00            | Ref.             | 3.12E-01             | rs60288721 rs1536389                                                               |
| H4        | 2        | CG           | 0.432        | 0.415        | 5.468         | 1.08            | 0.95-1.24          | 2.83E-01             | 1.07            | 0.94-1.23          | 3.44E-01             | 1.07            | 0.94-1.22        | 3.65E-01             | rs60288721 rs1536389                                                               |
| H4        | 2        | AA           | 0.075        | 0.073        | 5.468         | 1.07            | 0.83-1.38          | 8.08E-01             | 1.08            | 0.83-1.39          | 7.49E-01             | 1.06            | 0.82-1.37        | 8.24E-01             | rs60288721 rs1536389                                                               |
| H5        | 2        | CA           | 0.482        | 0.494        | 5.908         | 1.00            | Ref.               | 4.72E-01             | 1.00            | Ref.               | 5.06E-01             | 1.00            | Ref.             | 5.46E-01             | rs11199378 rs12768425                                                              |
| H5        | 2        | AC           | 0.491        | 0.477        | 5.908         | 1.06            | 0.93-1.06          | 3.82E-01             | 1.05            | 0.92-1.20          | 4.33E-01             | 1.04            | 0.92-1.19        | 5.04E-01             | rs11199378 rs12768425                                                              |
| H5        | 2        | AA           | 0.011        | 0.009        | 5.908         | 1.21            | 0.63-2.32          | 6.15E-01             | 1.19            | 0.61-2.30          | 6.51E-01             | 1.26            | 0.65-2.45        | 5.28E-01             | rs11199378 rs12768425                                                              |
| H5        | 2        | CC           | 0.016        | 0.020        | 5.908         | 0.81            | 0.50-1.32          | 3.34E-01             | 0.84            | 0.51-1.39          | 4.30E-01             | 0.86            | 0.52-1.41        | 4.75E-01             | rs11199378 rs12768425                                                              |
| H6        | 5        | GGAGA        | 0.408        | 0.359        | 41.913        | 1.00            | Ref.               | 2.03E-03             | 1.00            | Ref.               | 1.59E-03             | 1.00            | Ref.             | 1.59E-03             | rs978854 rs7910507 rs10886711 rs11199417 rs10886717                                |
| H6        | 5        | GAGGA        | 0.039        | 0.028        | 41.913        | 1.17            | 0.82-1.68          | 1.03E-01             | 1.19            | 0.83-1.70          | 8.96E-02             | 1.15            | 0.80-1.65        | 1.29E-01             | rs978854 rs7910507 rs10886711 rs11199417 rs10886717                                |
| H6        | 5        | AGGAA        | 0.209        | 0.189        | 41.913        | 0.97            | 0.81-1.16          | 1.16E-01             | 0.98            | 0.82-1.17          | 9.48E-02             | 0.97            | 0.81-1.16        | 1.08E-01             | rs978854 rs7910507 rs10886711 rs11199417 rs10886717                                |
| H6        | 5        | GAGGG        | 0.050        | 0.050        | 41.913        | 0.91            | 0.67-1.24          | 8.35E-01             | 0.90            | 0.66-1.24          | 8.67E-01             | 0.91            | 0.66-1.25        | 8.08E-01             | rs978854 rs7910507 rs10886711 rs11199417 rs10886717                                |
| <b>H6</b> | <b>5</b> | <b>GGGGA</b> | <b>0.242</b> | <b>0.302</b> | <b>41.913</b> | <b>0.70</b>     | <b>0.60-0.83</b>   | <b>4.67E-05</b>      | <b>0.70</b>     | <b>0.59-0.82</b>   | <b>3.28E-05</b>      | <b>0.69</b>     | <b>0.59-0.82</b> | <b>2.54E-05</b>      | <b>rs978854 rs7910507 rs10886711 rs11199417 rs10886717</b>                         |
| H6        | 5        | AGGGA        | 0.045        | 0.063        | 41.913        | 0.59            | 0.44-0.81          | 7.14E-03             | 0.59            | 0.43-0.81          | 7.29E-03             | 0.97            | 0.81-1.16        | 8.92E-03             | rs978854 rs7910507 rs10886711 rs11199417 rs10886717                                |
| H7        | 3        | GGG          | 0.439        | 0.408        | 2.751         | 1.00            | Ref.               | 6.06E-02             | 1.00            | Ref.               | 9.14E-02             | 1.00            | Ref.             | 7.22E-02             | rs75318356 rs7912073 rs11199429                                                    |
| H7        | 3        | GGA          | 0.403        | 0.402        | 2.751         | 0.93            | 0.81-1.07          | 9.55E-01             | 0.94            | 0.82-1.09          | 8.91E-01             | 0.93            | 0.81-1.08        | 9.83E-01             | rs75318356 rs7912073 rs11199429                                                    |
| H7        | 3        | AAA          | 0.115        | 0.123        | 2.751         | 0.87            | 0.70-1.07          | 3.95E-01             | 0.88            | 0.71-1.10          | 4.86E-01             | 0.87            | 0.70-1.08        | 4.20E-01             | rs75318356 rs7912073 rs11199429                                                    |
| H7        | 3        | GAA          | 0.044        | 0.065        | 2.751         | 0.63            | 0.47-0.85          | 4.83E-03             | 0.63            | 0.46-0.85          | 5.00E-03             | 0.64            | 0.47-0.87        | 7.71E-03             | rs75318356 rs7912073 rs11199429                                                    |
| H8        | 2        | GG           | 0.663        | 0.683        | 0.417         | 1.00            | Ref.               | 1.85E-01             | 1.00            | Ref.               | 2.16E-01             | 1.00            | Ref.             | 2.09E-01             | rs9943454 rs41287958                                                               |
| H8        | 2        | AG           | 0.259        | 0.250        | 0.417         | 1.07            | 0.92-1.24          | 5.11E-01             | 1.07            | 0.92-1.24          | 5.14E-01             | 1.07            | 0.92-1.25        | 4.71E-01             | rs9943454 rs41287958                                                               |
| H8        | 2        | GA           | 0.078        | 0.067        | 0.417         | 1.21            | 0.93-1.56          | 1.95E-01             | 1.18            | 0.91-1.53          | 2.54E-01             | 1.17            | 0.90-1.52        | 2.91E-01             | rs9943454 rs41287958                                                               |
| H9        | 2        | AG           | 0.523        | 0.512        | 6.032         | 1.00            | Ref.               | 5.01E-01             | 1.00            | Ref.               | 5.12E-01             | 1.00            | Ref.             | 5.39E-01             | rs2420779 rs12415215                                                               |
| H9        | 2        | CG           | 0.428        | 0.436        | 6.032         | 0.96            | 0.84-1.10          | 6.20E-01             | 0.96            | 0.84-1.10          | 6.28E-01             | 0.96            | 0.84-1.10        | 6.18E-01             | rs2420779 rs12415215                                                               |
| H9        | 2        | AA           | 0.050        | 0.052        | 6.032         | 0.92            | 0.69-1.24          | 6.90E-01             | 0.93            | 0.69-1.25          | 6.97E-01             | 0.94            | 0.70-1.28        | 7.91E-01             | rs2420779 rs12415215                                                               |
| H10       | 3        | AGA          | 0.291        | 0.293        | 12.005        | 1.00            | Ref.               | 9.01E-01             | 1.00            | Ref.               | 9.89E-01             | 1.00            | Ref.             | 9.86E-01             | rs10886725 rs7068008 rs4752444                                                     |
| H10       | 3        | AGG          | 0.273        | 0.248        | 12.005        | 1.11            | 0.93-1.41          | 9.20E-02             | 1.11            | 0.93-1.32          | 7.26E-02             | 1.11            | 0.93-1.32        | 6.41E-02             | rs10886725 rs7068008 rs4752444                                                     |
| H10       | 3        | AAG          | 0.280        | 0.280        | 12.005        | 1.01            | 0.85-1.20          | 9.95E-01             | 0.99            | 0.84-1.18          | 8.87E-01             | 1.00            | 0.84-1.19        | 9.09E-01             | rs10886725 rs7068008 rs4752444                                                     |
| H10       | 3        | GAG          | 0.156        | 0.178        | 12.005        | 0.89            | 0.73-1.08          | 7.51E-02             | 0.87            | 0.72-1.06          | 5.85E-02             | 0.87            | 0.71-1.06        | 4.66E-02             | rs10886725 rs7068008 rs4752444                                                     |
| H11       | 3        | AGG          | 0.523        | 0.533        | 0.866         | 1.00            | Ref.               | 5.42E-01             | 1.00            | Ref.               | 5.91E-01             | 1.00            | Ref.             | 6.15E-01             | rs2420768 rs7914572 rs11594222                                                     |
| H11       | 3        | GAG          | 0.249        | 0.235        | 0.866         | 1.07            | 0.92-1.26          | 3.07E-01             | 1.08            | 0.92-1.26          | 2.75E-01             | 1.12            | 0.91-1.38        | 2.62E-01             | rs2420768 rs7914572 rs11594222                                                     |
| H11       | 3        | GGG          | 0.123        | 0.111        | 0.866         | 1.12            | 0.91-1.38          | 2.72E-01             | 1.11            | 0.90-1.37          | 3.12E-01             | 1.08            | 0.92-1.26        | 2.64E-01             | rs2420768 rs7914572 rs11594222                                                     |
| H11       | 3        | GGA          | 0.104        | 0.121        | 0.866         | 0.89            | 0.72-1.09          | 1.21E-01             | 0.88            | 0.71-1.08          | 9.46E-02             | 0.86            | 0.70-1.06        | 6.28E-02             | rs2420768 rs7914572 rs11594222                                                     |
| H12       | 3        | CGA          | 0.361        | 0.363        | 18.819        | 1.00            | Ref.               | 8.97E-01             | 1.00            | Ref.               | 9.90E-01             | 1.00            | Ref.             | 9.12E-01             | rs10458766 rs11199483 rs12570141                                                   |
| H12       | 3        | AAA          | 0.280        | 0.255        | 18.819        | 1.10            | 0.93-1.30          | 8.82E-02             | 1.08            | 0.92-1.28          | 1.35E-01             | 1.09            | 0.92-1.29        | 1.43E-01             | rs10458766 rs11199483 rs12570141                                                   |
| H12       | 3        | AGA          | 0.272        | 0.278        | 18.819        | 0.98            | 0.83-1.15          | 6.53E-01             | 0.98            | 0.83-1.15          | 7.19E-01             | 0.98            | 0.83-1.16        | 6.62E-01             | rs10458766 rs11199483 rs12570141                                                   |
| H12       | 3        | AGG          | 0.084        | 0.100        | 18.819        | 0.84            | 0.66-1.07          | 9.04E-02             | 0.83            | 0.66-1.06          | 8.19E-02             | 0.87            | 0.68-1.10        | 1.55E-01             | rs10458766 rs11199483 rs12570141                                                   |

Identified haplotypes from genotyped variants in *PLPP4* ±100 kb upstream or downstream. A total of 45 haplotypes were identified in 12 haplotype blocks.

<sup>a</sup> Unadjusted logistic regression analyses

<sup>b</sup> Logistic regression analyses adjusted for age, sex and PC1-5

<sup>c</sup> Logistic regression analyses adjusted for age, sex, PC1-5 and tobacco use

Haplotypes indicating a significant association with PD at a corrected p-value threshold of 0.003 are marked in bold.

**Table 4: Number of variants in *PLPP4* tested through SKAT and the results statistics at MAF threshold 1% and 5% in the genotyped data vs the imputed**

|                       | MAF < 1%     |         | MAF < 5%     |              |
|-----------------------|--------------|---------|--------------|--------------|
|                       | No. Variants | p-value | No. Variants | p-value      |
| <b>Genotyped data</b> |              |         |              |              |
| All variants          | 1            | NA      | <b>16</b>    | <b>0.002</b> |
| Coding variants       | 0            | NA      | 0            | NA           |
| <b>Imputed data</b>   |              |         |              |              |
| All variants          | 402          | 0.109   | 628          | 0.005        |
| Coding variants       | 1            | 0.562   | 1            | 0.562        |

Analyses were adjusted for age at inclusion, sex and PC1-5  
Results significant at Bonferroni correction are highlighted in bold

## Figures

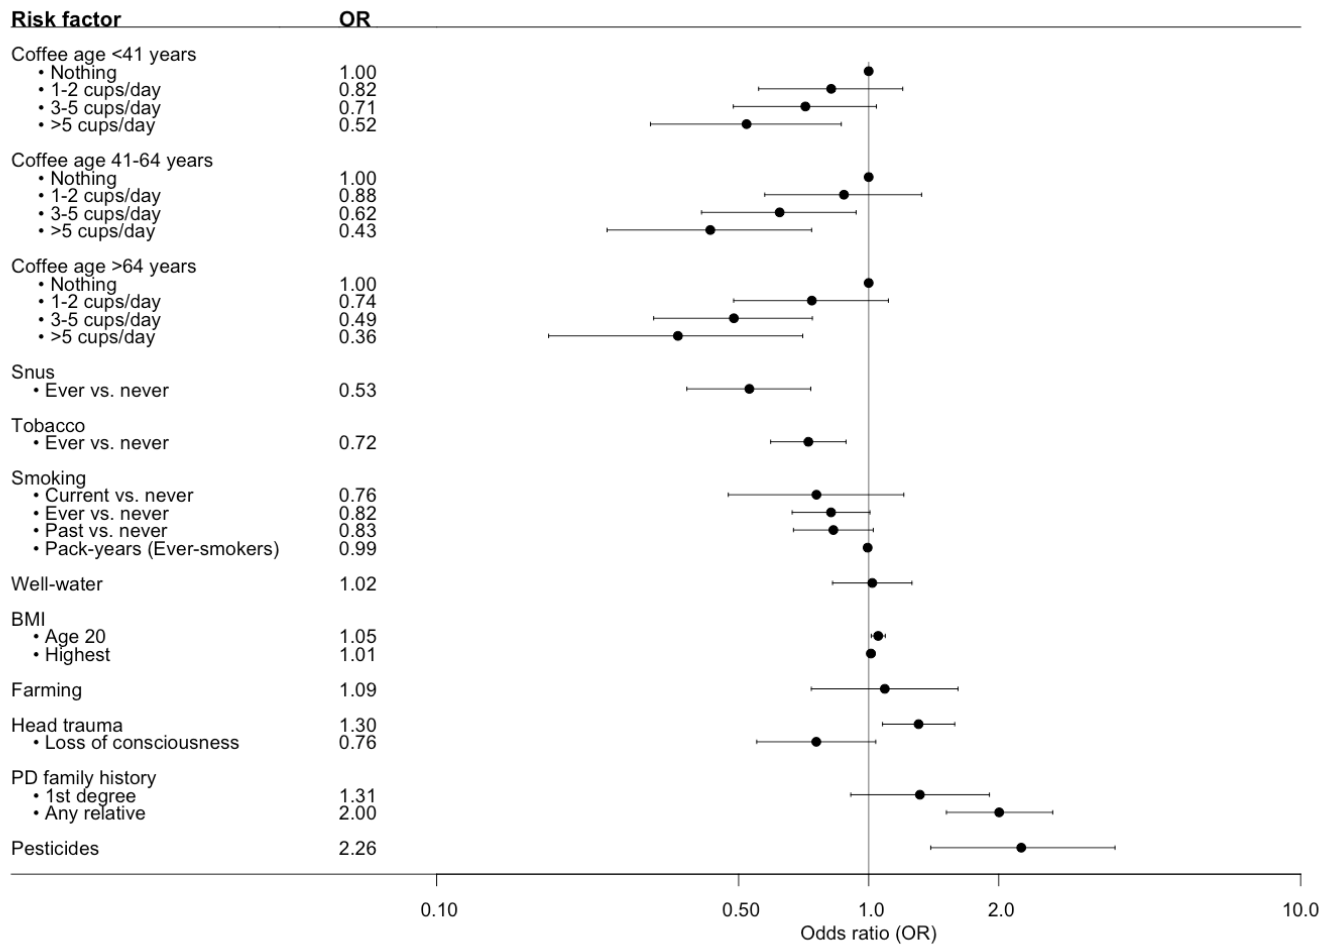

**Figure 1: Forest plot over the associations between risk factors and PD in MPBC.**

Showing the adjusted OR and 95% CI. Number of individuals in each analysis is found in Table S1.

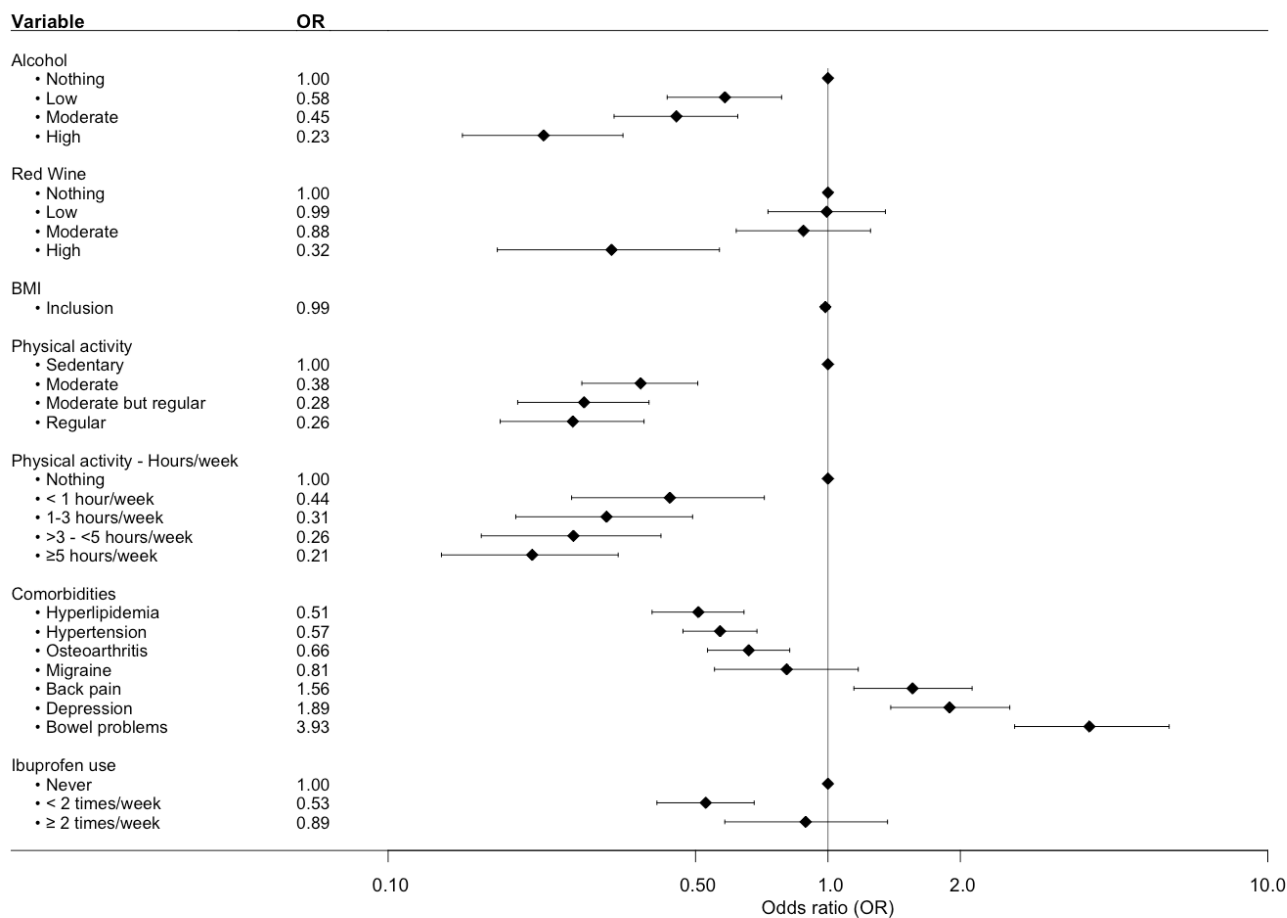

**Figure 2: Forest plot over the associations between various variables and PD.** Analyzed variables were obtained from questions regarding exposure/use within the past year prior to study inclusion. The plot shows OR and 95% CI adjusted by age at inclusion and sex. Number of individuals in each analysis is found in Table S2.

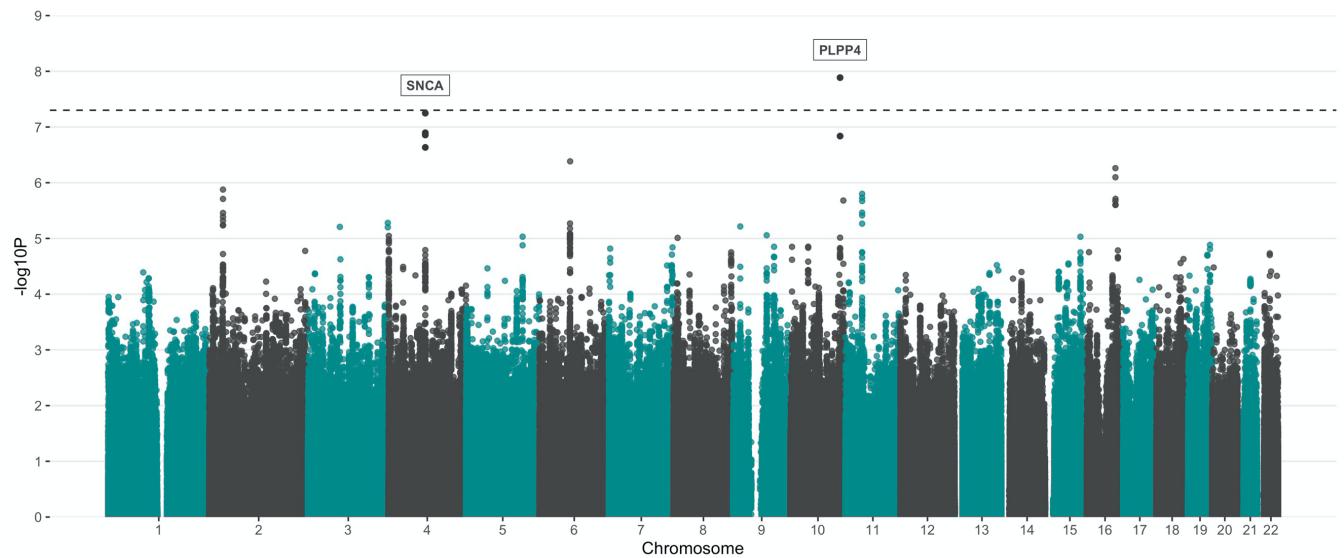

**Figure 3: Manhattan plot showing the result from PD GWA analysis.** A total of 5,445,841 SNPs (MAF >5%) were tested for 929 PD patients vs 935 controls. The y-axis represents the negative log (two-sided p-values) for association of variants with PD and the x-axis represent the genomic position on genome build GRCh37. The horizontal dashed line indicates the genome-wide significance level ( $p=5E-08$ ).



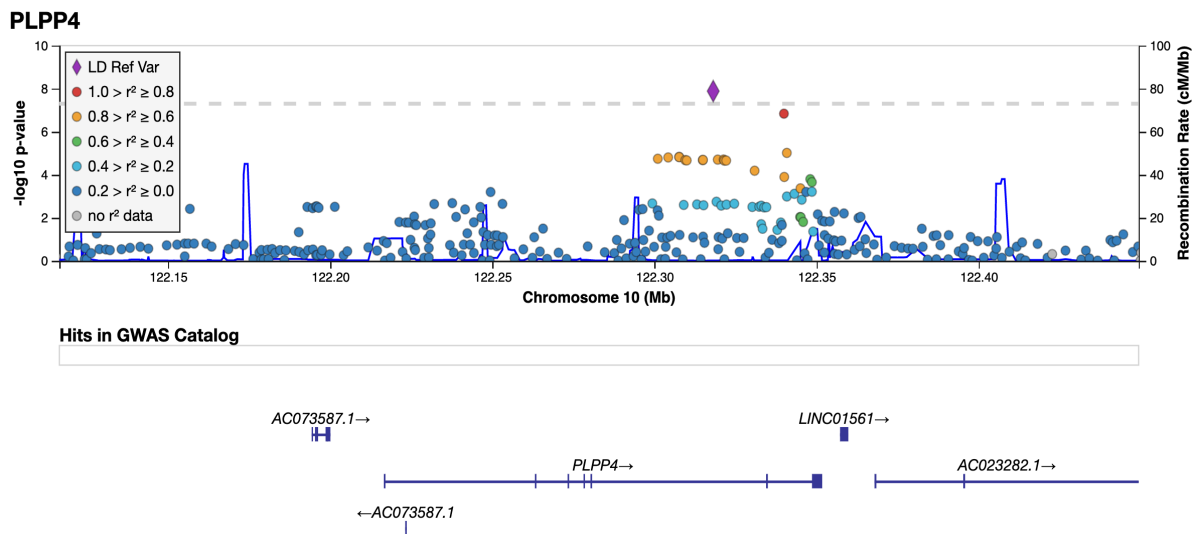

**Figure 4: LocusZoom plot for PD GWAS *PLPP4* loci.** Imputed and genotyped variants passing QC in the *PLPP4* gene +/- 100 kb (10:122116466-122449376) mapped to genome build GRCh37. The only coding gene in the region is *PLPP4*, other include pseudogenes (AC073587.1) and long non-coding RNA (LINC01561, AC023282.1, WDR11-AS1). The variant with lowest p-value (index) is indicated as a purple diamond. Marker colors indicate the strength of LD as  $r^2$  between the index variant and other variants in the 1000 Genomes EUR population.

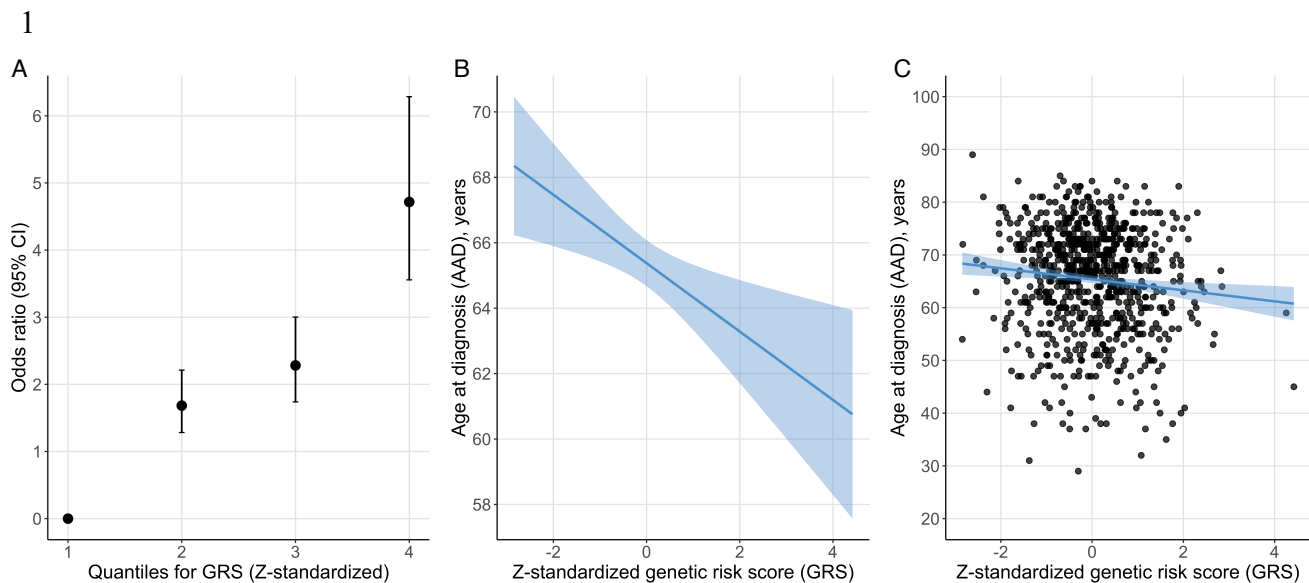

**Figure 5: Genetic risk score (GRS) quartiles vs disease status (A) and age at diagnosis (AAD) (B and C).** A: Odds ratio of PD status per risk quartile of the Z-standardized GRS. B: Regression line for the association between the Z-standardized GRS and AAD. The line represents the parameter estimate and the shading the 95% CI of the regression model. The model was adjusted for sex, PD family history, and PC1-5. C: AAD and Z-standardized GRS for each study participant with the regression model in plot B fitted to the plot.
